# Supplementary material for: Stimuli-responsive gelators from carbamoyl sugar derivatives and their responses to metal ions and tetrabutylammonium salts
Source: PubMed Central journal article supplement — RSC Adv. 2020 Nov 4;10(66):40068–83. doi: 10.1039/d0ra07587f (PMC9057480; doi:10.1039/d0ra07587f), 2020-11-04
Supplement: RA-010-D0RA07587F-s001.pdf [file RA-010-D0RA07587F-s001.pdf]

## **Electronic supplementary information**

### **Stimuli-responsive gelators from carbamoyl sugar derivatives and their responses to metal ions and tetrabutylammonium salts**

Dan Wang, Anji Chen, Joedian Morris, Guijun Wang\*

Department of Chemistry and Biochemistry, Old Dominion University, Norfolk, VA 23529, USA.

E-mail, [g1wang@odu.edu](mailto:g1wang@odu.edu).

## Table of contents

### Part I.

|                                                                                              |     |
|----------------------------------------------------------------------------------------------|-----|
| 1. Stability of the gels in basic solutions                                                  | S3  |
| 2. Stability of compound <b>18</b> in an organic base                                        | S7  |
| 3. Gelation of tetramethylammonium bromide electrolytes                                      | S8  |
| 4. Gelation of tetrabutylammonium salts and response to chemical stimuli                     | S9  |
| 5. Rheological data and amplitude experiments of compounds <b>17</b> and <b>20</b>           | S10 |
| 6. <sup>1</sup> H NMR spectra of compounds <b>13</b> and <b>20</b> at different temperatures | S20 |
| 7. NMR studies of compound <b>18</b> with tetrabutylammonium bromide                         | S24 |
| 8. NMR studies of compound <b>20</b> with tetrabutylammonium bromide                         | S28 |
| 9. Gel photos of naproxen release studies                                                    | S31 |

### Part II.

|                                                                         |     |
|-------------------------------------------------------------------------|-----|
| <sup>1</sup> H and <sup>13</sup> C NMR spectra of carbamate derivatives | S32 |
| 2D NMR spectra for the compounds, HSQC and COSY spectra                 | S43 |

## Part I.

### 1. Stability of the gels in basic solutions

The gel stability in alkaline conditions was analyzed and the results are summarized in Figure S1. The gels formed by compounds **13** (hexyl) and **17** (benzyl) in EtOH:H<sub>2</sub>O (v/v 1:1) were used for the analysis, 0.4 mL of the gels were prepared then 0.4 mL of pH 10 and pH 12 solutions were added to the top of the gel carefully. The gel stability was checked by tilting the vials at certain time intervals (14 h, 36 h, 144 h). The gel formed by gelator **17** with pH 12 solution started to fall apart at 14 h while the other gels were stable for a much longer time (6 days).

A 12 mg sample of compound **13** was added to two vials and 0.4 mL EtOH/H<sub>2</sub>O (v/v, 1/1) was added to make the gel. After heating and sonicating each vial, they were left standing at room temperature for 30 minutes undisturbed. Stable gels were formed. The gels for compound **17** were prepared the same way, using 3.0 mg of compound **17** and 0.4 mL EtOH/H<sub>2</sub>O (v/v, 1/1); then 0.4 mL pH 10 or pH 12 solution was added to all gels respectively. The <sup>1</sup>H NMR spectra of compound **17** recovered from the gel vials (Figure S1-4 d) after the addition of pH 12 solution for 144 h are shown in Figure S1-5.

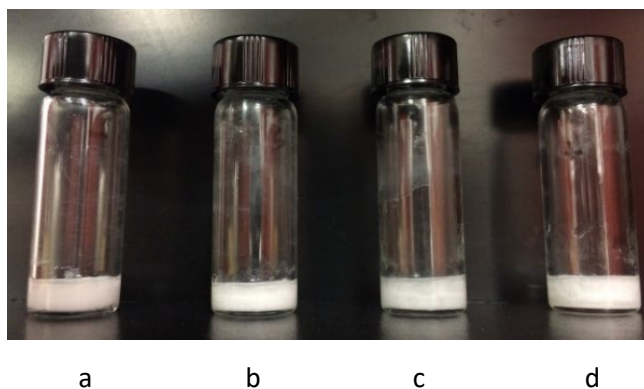

Figure S1-1. a, b) Gels formed by compound **13** in EtOH/H<sub>2</sub>O (v/v, 1/1), 30.0 mg/mL; c, d) gels formed by compound **17** in EtOH/H<sub>2</sub>O (v/v, 1/1) at 7.5 mg/mL.

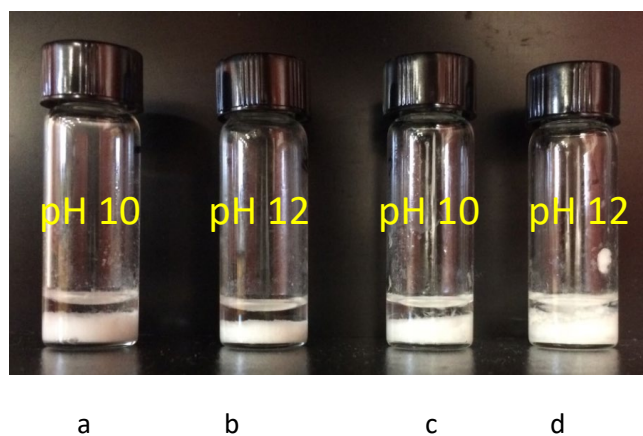

Figure S1-2. The gels in Figure S1-1 with equal volumes (0.4 mL) of basic aqueous solutions after 14 hours.

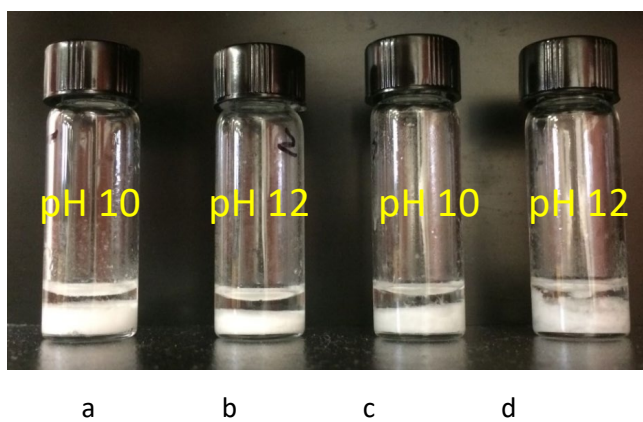

Figure S1-3. The gels in Figure S1-1 with equal volumes (0.4 mL) of basic aqueous solutions after 36 hours.

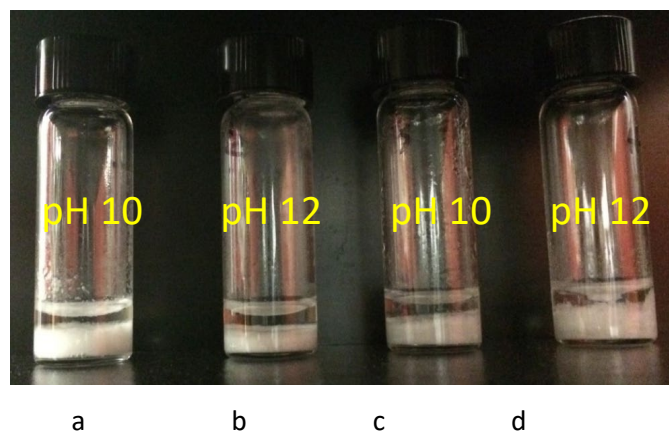

Figure S1-4. The gels in Figure S1-1 with equal volumes (0.4 mL) of basic aqueous solutions after 144 hours (6 days).

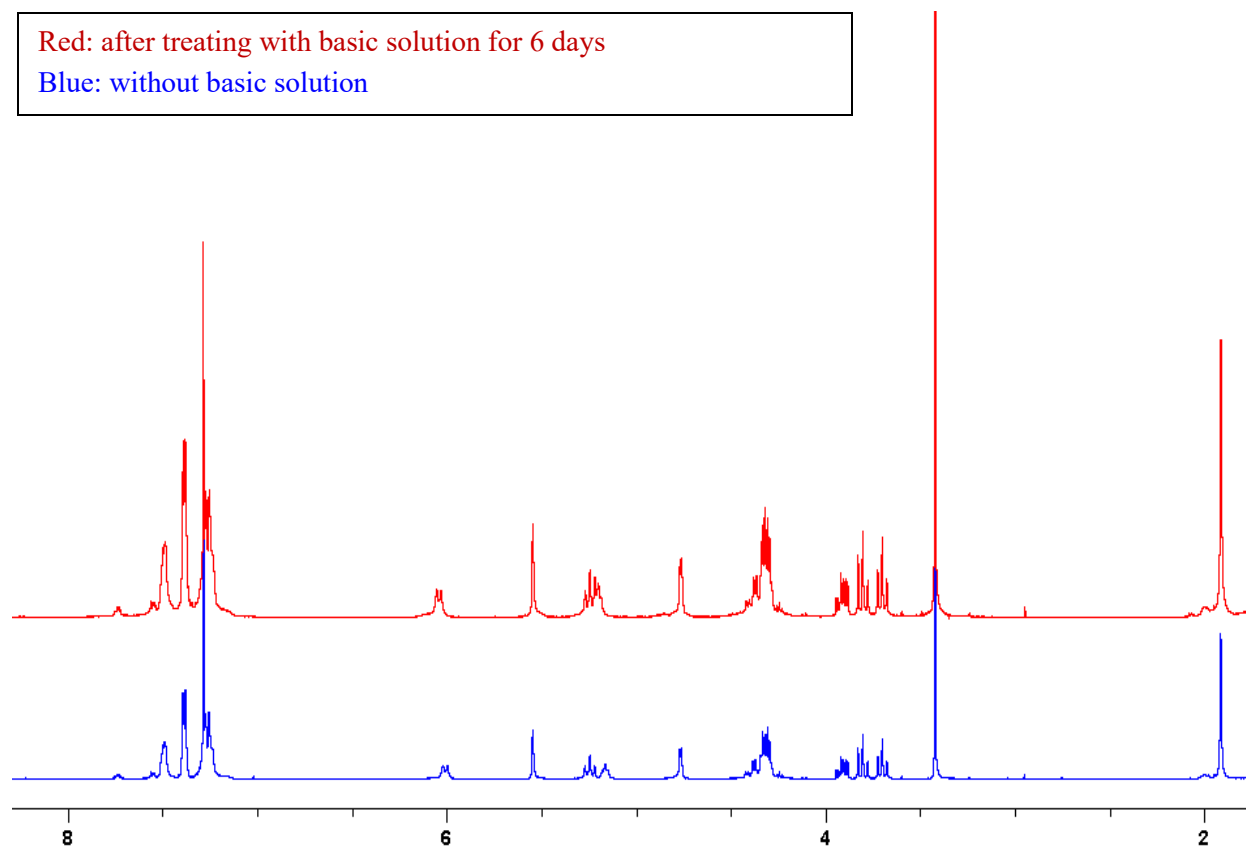

Figure S1-5. <sup>1</sup>H NMR spectra of compound **17** before (blue) and after addition of pH 12 solution (red), the NMR spectrum in red shows the compound extracted from the mixture in pH 12 solution for 6 days.

## 2. Stability of compound **18** in an organic base

The properties of the compound **18** under basic conditions were also analyzed by treating with DBU. A gel was prepared with compound **18** in DMSO:H<sub>2</sub>O (v/v 1:1), then 5 equiv. of DBU was added to the vial. The mixture was reheated and then left standing at rt for 1 h, the gel didn't reform. The mixture was analyzed using TLC and NMR, the results indicate that **18** was stable in the presence of 5 equiv. of DBU. The sample was prepared using compound **18** (2 mg,  $4.11 \times 10^{-3}$  mmol, 1 equiv.) in 0.8 mL of DMSO/H<sub>2</sub>O (v/v 1:1) and 1,8-diazabicyclo(5.4.0) undec-7-ene (DBU) (3.1 mg,  $2.055 \times 10^{-2}$  mmol, 5 equiv.).

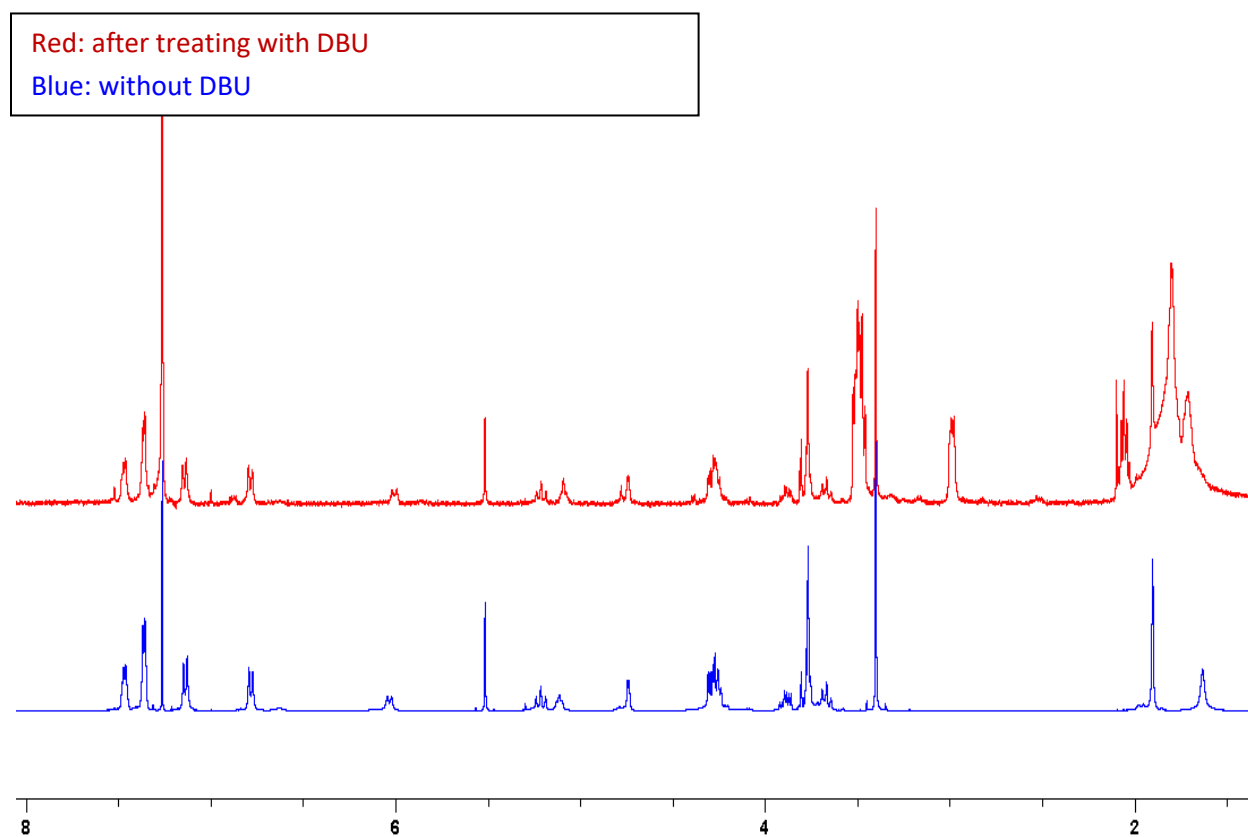

Figure S2. <sup>1</sup>H NMR spectra of compound **18** before (blue) and after addition of DBU (red).

### 3. Gelation of tetramethylammonium bromide electrolytes

Compound **18** (2.0 mg,  $4.11 \times 10^{-3}$  mmol, 1.0 equiv.) formed a stable gel (Figure S3-a) in 0.8 mL of DMSO:H<sub>2</sub>O (v/v 1:1) in the presence of 0.5 equiv. of tetramethylammonium bromide (0.32 mg,  $2.05 \times 10^{-3}$  mmol). To the same gel in Fig S3-a, another 4.5 equiv. of the TMABr (2.85 mg,  $1.85 \times 10^{-2}$  mmol) was added, the mixture was heated to dissolve the salt and allowed to cool down to rt for 30 minutes, a stable gel reformed and is depicted in Figure S3-b. To the gel in Figure 3-b, an additional 5 equiv. of TMABr (3.2 mg,  $2.06 \times 10^{-2}$  mmol) was added and the mixture was heated again to a clear solution, upon cooling a stable gel reformed, this is shown in Figure S3-c.

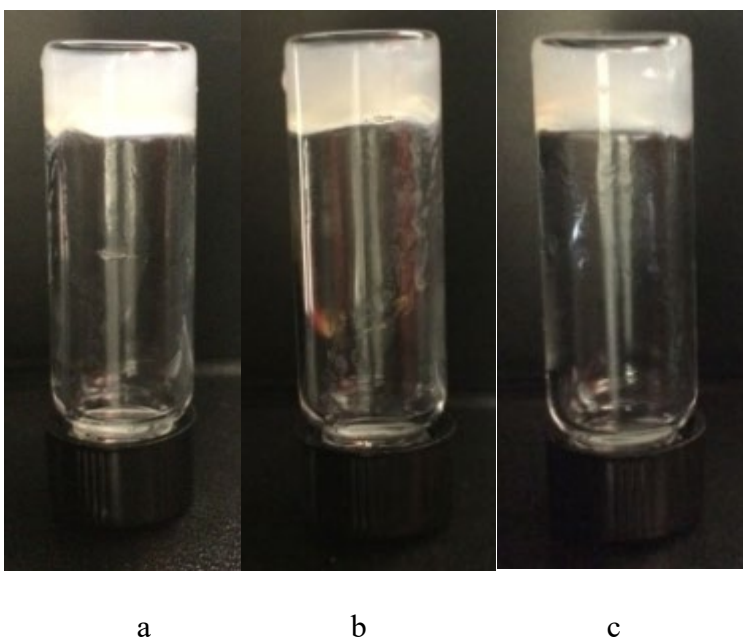

Figure S3. The gels formed by compound **18** in the presence of different amounts of TMABr. All samples contain compound **18** (2.0 mg,  $4.11 \times 10^{-3}$  mmol, 1.0 equiv.) in 0.8 mL of DMSO:H<sub>2</sub>O (v/v 1:1) and the TMABr for a) 0.32 mg,  $2.05 \times 10^{-3}$  mmol, 0.5 equiv.; b) 0.32+2.85=3.17 mg,  $2.06 \times 10^{-2}$  mmol, 5.0 equiv.; c) 0.32+2.85+3.2=6.4 mg,  $4.11 \times 10^{-2}$  mmol, 10.0 equiv.

#### 4. Gelation of tetrabutylammonium salts and response to chemical stimuli

Compound **18** (2.0 mg,  $4.11 \times 10^{-3}$  mmol, 1.0 equiv.) was added in 0.8 mL of DMSO:H<sub>2</sub>O (v/v 1:1) followed by the addition of 0.5 equiv. of tetrabutylammonium salts of iodide, bromide, bisulfate and fluoride (0.8 mg, 0.7 mg, 0.7 mg, 0.7  $\mu$ L,  $2.06 \times 10^{-3}$  mmol, 0.5 equiv. to compound **18**). Gels were formed after heating and sonicating the mixtures in the vial. Upon further addition of 4.5 equiv. of the tetrabutylammonium salts of iodide, bromide, bisulfate and fluoride (7.2 mg, 6.3 mg, 6.3 mg and 6.3  $\mu$ L,  $1.85 \times 10^{-2}$  mmol, 4.5 equiv.) to compound **18** the gels reformed after heating and sonicating the mixtures in the vial. After adding another 5 equiv. of the tetrabutylammonium salts of iodide, bromide, bisulfate and fluoride (8.0 mg, 7.0 mg, 7.0 mg and 7.0  $\mu$ L,  $2.06 \times 10^{-2}$  mmol, 5.0 equiv.) to the same vials, followed by reheating and sonicating, the gels containing TBA salts of bromide and bisulfate became unstable. After adding 10 equiv. of acetic acid (2.3  $\mu$ L,  $4.11 \times 10^{-2}$  mmol) to all vials, the gel properties containing TBABr salts were restored.

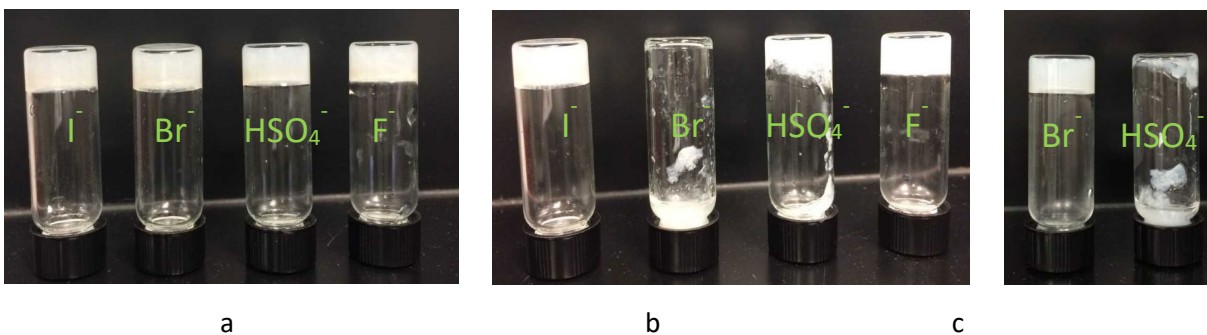

Figure S4. a) Gel pictures of compound **18** (2 mg) in 8 mL of DMSO:H<sub>2</sub>O (v/v 1:1) with 5 equiv. of TBA salts of iodide, bromide, bisulfate and fluoride; b) Gel pictures after adding up to 10 equiv. of TBA salts; c) Pictures of gel containing 10 equiv. of TBA salts after adding 10 equiv. of acetic acid.

## 5. Rheological data and amplitude experiments of compounds 17 and 20

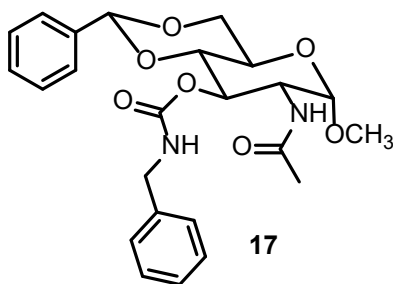

EtOH:H<sub>2</sub>O=1:2  
2.5 mg/mL opaque

| Compound <b>17</b><br>2.5 mg/mL, EtOH/H <sub>2</sub> O, 1:2 |                               |                             |               |
|-------------------------------------------------------------|-------------------------------|-----------------------------|---------------|
| Angular frequency                                           | Storage modulus ( <i>G'</i> ) | Loss modulus ( <i>G''</i> ) | <i>G'/G''</i> |
| rad/s                                                       | Pa                            | Pa                          |               |
| 0.1                                                         | 1333.1                        | 438.395                     | 3.040865      |
| 0.15849                                                     | 1530.59                       | 436.608                     | 3.505639      |
| 0.251189                                                    | 1686.17                       | 418.224                     | 4.031739      |
| 0.398107                                                    | 1801.42                       | 414.081                     | 4.350405      |
| 0.630957                                                    | 1899.84                       | 401.489                     | 4.731985      |
| 1.0                                                         | 1982.24                       | 391.607                     | 5.061809      |
| 1.5849                                                      | 2082.31                       | 373.351                     | 5.577352      |
| 2.51189                                                     | 2157.96                       | 362.271                     | 5.956756      |
| 3.98105                                                     | 2235.16                       | 347.212                     | 6.43745       |
| 6.30957                                                     | 2307.65                       | 350.14                      | 6.590649      |
| 10.0001                                                     | 2375.95                       | 338.832                     | 7.012177      |
| 15.849                                                      | 2452.18                       | 337.418                     | 7.267484      |
| 25.1188                                                     | 2531.67                       | 335.825                     | 7.538659      |
| 39.8105                                                     | 2600.78                       | 339.322                     | 7.664637      |
| 63.0957                                                     | 2689.22                       | 352.276                     | 7.633844      |
| 100.0                                                       | 2806.4                        | 347.122                     | 8.084766      |

Table S1. Storage modulus (*G'*), loss modulus (*G''*) and *G'/G''* values for the gel formed by compound **17** in EtOH:H<sub>2</sub>O (v/v 1/2) at different angular frequencies.

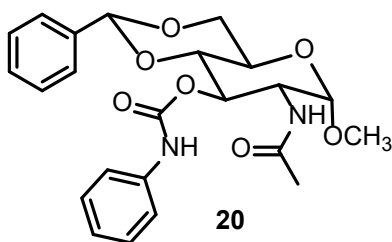

EtOH:H<sub>2</sub>O=1:1  
3.3 mg/mL opaque

| Compound <b>20</b><br>3.3 mg/mL, EtOH/H <sub>2</sub> O, 1:1 |                               |                             |               |
|-------------------------------------------------------------|-------------------------------|-----------------------------|---------------|
| Angular frequency                                           | Storage modulus ( <i>G'</i> ) | Loss modulus ( <i>G''</i> ) | <i>G'/G''</i> |
| rad/s                                                       | Pa                            | Pa                          |               |
| 0.1                                                         | 10557.8                       | 2475.75                     | 4.264486      |
| 0.15849                                                     | 11818.2                       | 2346.79                     | 5.0359        |
| 0.251189                                                    | 12616.0                       | 2293.77                     | 5.500116      |
| 0.398107                                                    | 13364.7                       | 2285.43                     | 5.847784      |
| 0.630957                                                    | 13981.7                       | 2284.54                     | 6.120138      |
| 1.0                                                         | 14507.8                       | 2238.46                     | 6.481152      |
| 1.5849                                                      | 15078.1                       | 2236.24                     | 6.742613      |
| 2.51189                                                     | 15618.6                       | 2304.5                      | 6.777435      |
| 3.98105                                                     | 16176.3                       | 2302.41                     | 7.025812      |
| 6.30957                                                     | 16719.1                       | 2363.85                     | 7.072826      |
| 10.0001                                                     | 17263.0                       | 2412.86                     | 7.15458       |
| 15.849                                                      | 17866.9                       | 2463.27                     | 7.253326      |
| 25.1188                                                     | 18443.8                       | 2595.99                     | 7.104727      |
| 39.8105                                                     | 19151.6                       | 2693.74                     | 7.109669      |
| 63.0957                                                     | 19800.1                       | 2851.01                     | 6.944942      |
| 100.0                                                       | 20621.3                       | 2755.38                     | 7.484013      |

Table S2. Storage modulus (*G'*), loss modulus (*G''*) and *G'/G''* values for the gel formed by compound **20** in EtOH:H<sub>2</sub>O (v/v 1/1) at different angular frequencies.

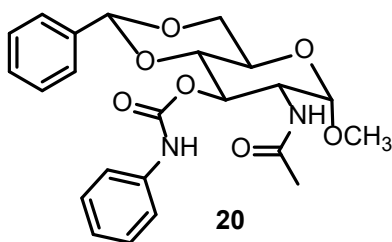

EtOH:H<sub>2</sub>O=1:2  
2.5 mg/mL opaque

| Compound <b>20</b><br>2.5 mg/mL, EtOH/H <sub>2</sub> O, 1:2 |                               |                             |               |
|-------------------------------------------------------------|-------------------------------|-----------------------------|---------------|
| Angular frequency                                           | Storage modulus ( <i>G'</i> ) | Loss modulus ( <i>G''</i> ) | <i>G'/G''</i> |
| rad/s                                                       | Pa                            | Pa                          |               |
| 0.1                                                         | 21201.9                       | 4744.87                     | 4.264486      |
| 0.15849                                                     | 23210.7                       | 4322.71                     | 5.0359        |
| 0.251189                                                    | 24573.6                       | 4107.44                     | 5.500116      |
| 0.398107                                                    | 25860.4                       | 4019.82                     | 5.847784      |
| 0.630957                                                    | 26976.3                       | 3976.89                     | 6.120138      |
| 1.0                                                         | 28049.6                       | 4041.99                     | 6.481152      |
| 1.5849                                                      | 29143.1                       | 4029.59                     | 6.742613      |
| 2.51189                                                     | 30199.0                       | 4087.21                     | 6.777435      |
| 3.98105                                                     | 31318.0                       | 4160.08                     | 7.025812      |
| 6.30957                                                     | 32481.4                       | 4133.09                     | 7.072826      |
| 10.0001                                                     | 33641.1                       | 4231.85                     | 7.15458       |
| 15.849                                                      | 34847.6                       | 4250.01                     | 7.253326      |
| 25.1188                                                     | 36097.0                       | 4285.21                     | 7.104727      |
| 39.8105                                                     | 37341.3                       | 4381.39                     | 7.109669      |
| 63.0957                                                     | 38353.0                       | 4484.01                     | 6.944942      |
| 100.0                                                       | 40213.0                       | 3601.81                     | 7.484013      |

Table S3. Storage modulus (*G'*), loss modulus (*G''*) and *G'/G''* values for the gel formed by compound **20** in EtOH:H<sub>2</sub>O (v/v 1/2) at different angular frequencies.

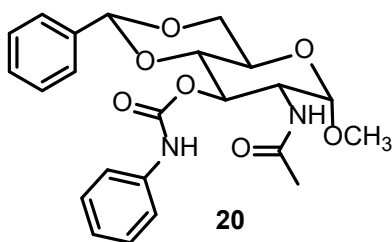

DMSO:H<sub>2</sub>O=1:1  
4.0 mg/mL opaque

| Compound <b>20</b><br>4.0 mg/mL, DMSO/H <sub>2</sub> O, 1:1 |                                     |                                   |               |
|-------------------------------------------------------------|-------------------------------------|-----------------------------------|---------------|
| Angular<br>frequency                                        | Storage<br>modulus<br>( <i>G'</i> ) | Loss<br>modulus<br>( <i>G''</i> ) | <i>G'/G''</i> |
| rad/s                                                       | Pa                                  | Pa                                |               |
| 0.1                                                         | 5092.46                             | 1682.21                           | 3.027244      |
| 0.15849                                                     | 5511.36                             | 1625.87                           | 3.389791      |
| 0.251189                                                    | 5697.19                             | 1544.32                           | 3.689125      |
| 0.398107                                                    | 5973.17                             | 1404.64                           | 4.252456      |
| 0.630957                                                    | 6241.91                             | 1307.95                           | 4.772285      |
| 1.0                                                         | 6357.21                             | 1230.38                           | 5.166867      |
| 1.5849                                                      | 6537.37                             | 1191.55                           | 5.486442      |
| 2.51189                                                     | 6679.0                              | 1147.93                           | 5.818299      |
| 3.98105                                                     | 6808.81                             | 1039.82                           | 6.548066      |
| 6.30957                                                     | 6843.25                             | 1067.1                            | 6.412942      |
| 10.0001                                                     | 7039.21                             | 1027.74                           | 6.849213      |
| 15.849                                                      | 7199.56                             | 979.784                           | 7.348109      |
| 25.1188                                                     | 7309.85                             | 970.764                           | 7.529997      |
| 39.8105                                                     | 7428.82                             | 958.687                           | 7.748952      |
| 63.0957                                                     | 7492.72                             | 976.236                           | 7.675111      |
| 100.0                                                       | 7685.26                             | 975.933                           | 7.874782      |

Table S4. Storage modulus (*G'*), loss modulus (*G''*) and *G'/G''* values for the gel formed by compound **20** in DMSO:H<sub>2</sub>O (v/v 1/1) at different angular frequencies.

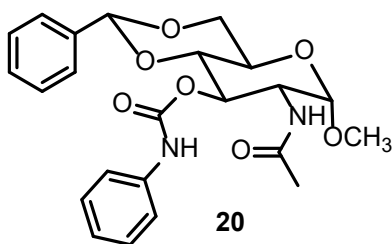

Toluene  
2.8 mg/mL opaque

| Compound <b>20</b><br>2.8 mg/mL, Toluene |                                |                              |          |
|------------------------------------------|--------------------------------|------------------------------|----------|
| Angular<br>frequency                     | Storage<br>modulus<br>( $G'$ ) | Loss<br>modulus<br>( $G''$ ) | $G'/G''$ |
| rad/s                                    | Pa                             | Pa                           |          |
| 0.1                                      | 652.469                        | 61.6158                      | 10.58931 |
| 0.15849                                  | 686.316                        | 55.8585                      | 12.28669 |
| 0.251189                                 | 716.804                        | 51.8025                      | 13.83725 |
| 0.398107                                 | 749.154                        | 49.9245                      | 15.00574 |
| 0.630957                                 | 762.787                        | 47.874                       | 15.93322 |
| 1.0                                      | 778.765                        | 43.6425                      | 17.84419 |
| 1.5849                                   | 793.429                        | 41.049                       | 19.32883 |
| 2.51189                                  | 806.645                        | 42.1127                      | 19.15444 |
| 3.98105                                  | 816.782                        | 41.825                       | 19.52856 |
| 6.30957                                  | 830.491                        | 41.9019                      | 19.81989 |
| 10.0001                                  | 841.69                         | 41.0918                      | 20.48316 |
| 15.849                                   | 858.033                        | 45.7647                      | 18.7488  |
| 25.1188                                  | 870.971                        | 48.3439                      | 18.01615 |
| 39.8105                                  | 887.049                        | 54.2949                      | 16.33761 |
| 63.0957                                  | 912.425                        | 63.218                       | 14.43299 |
| 100.0                                    | 958.208                        | 71.2342                      | 13.45152 |

Table S5. Storage modulus ( $G'$ ), loss modulus ( $G''$ ) and  $G'/G''$  values for the gel formed by compound **20** in toluene at different angular frequencies.

### Amplitude sweep experiments for rheology study

Amplitude sweep experiments were performed by the HR-2 Discovery Hybrid Rheometer from TA Instruments. All gels at their minimum gelation concentration were prepared in a 1-dram vial in different solvents (or solvent mixtures) and they were left undisturbed on the bench for 2 hours. The sample (approximately 1 mL) was placed on the steel plate of the rheometer. The experimental temperature was 25 °C. The samples were subjected to an amplitude sweep between 25-mm peltier plate and steel plate with a gap of 100  $\mu\text{m}$ . The angular frequency was set as 10.0 rad/s. The operating and processing software used was TRIOS. The results for the storage moduli ( $G'$ ) and loss moduli ( $G''$ ) were as a function of oscillation strain in a range from 0.125% to 125%.

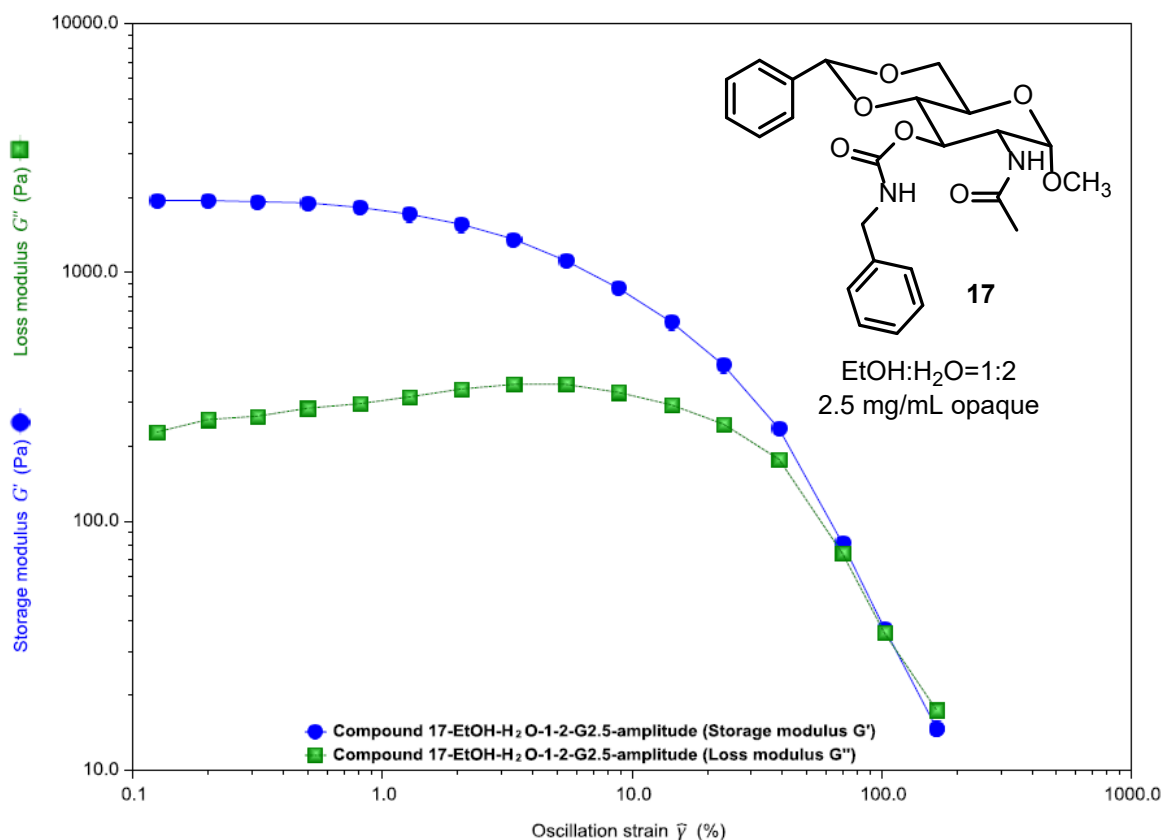

Figure S5-1. Rheological properties of the amplitude sweep experiment for the gel formed by compound **17** in EtOH:H<sub>2</sub>O (v/v 1/2).

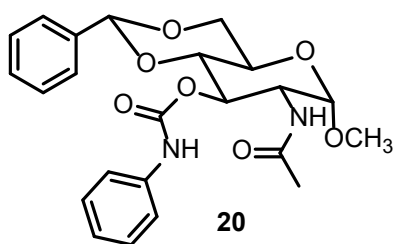

EtOH:H<sub>2</sub>O=1:1  
3.3 mg/mL opaque

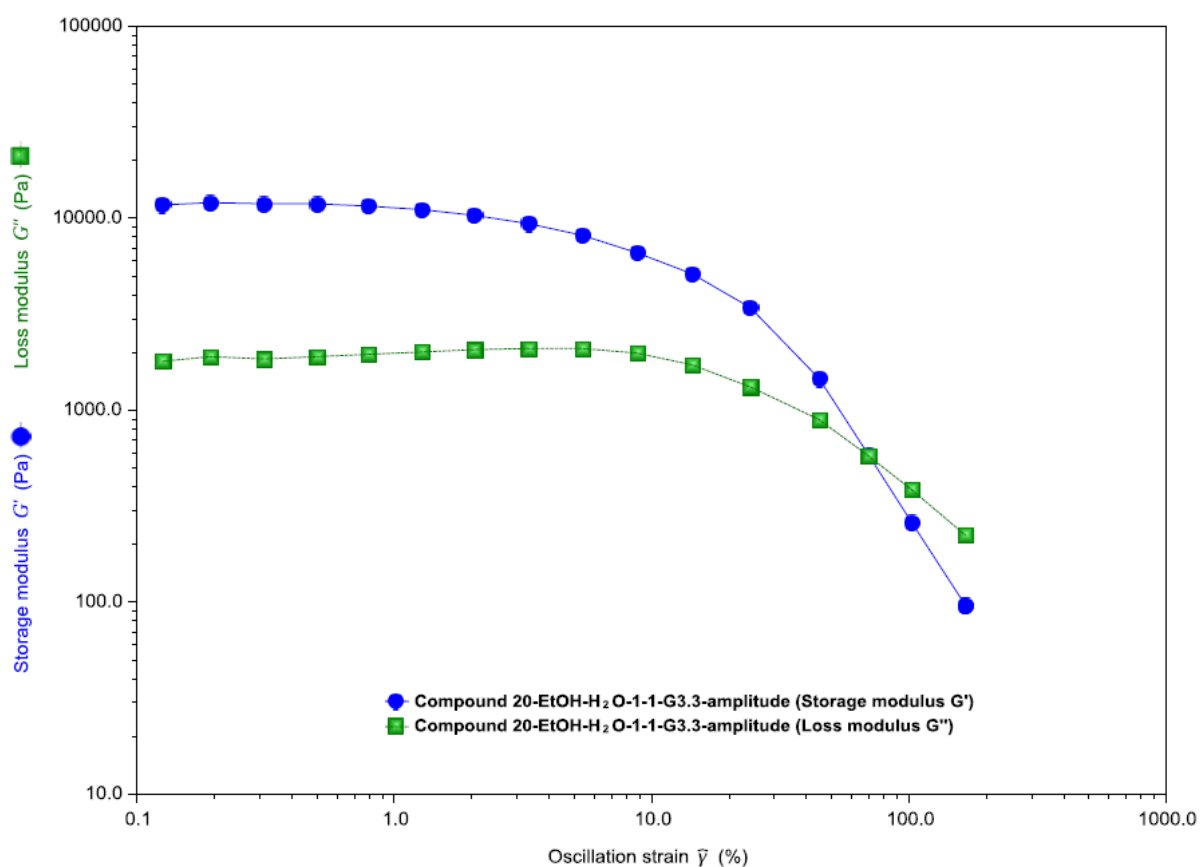

Figure S5-2. Rheological properties of the amplitude sweep experiment for the gel formed by compound **20** in EtOH:H<sub>2</sub>O (v/v 1/1).

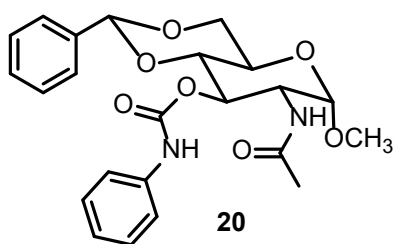

EtOH:H<sub>2</sub>O=1:2  
2.5 mg/mL opaque

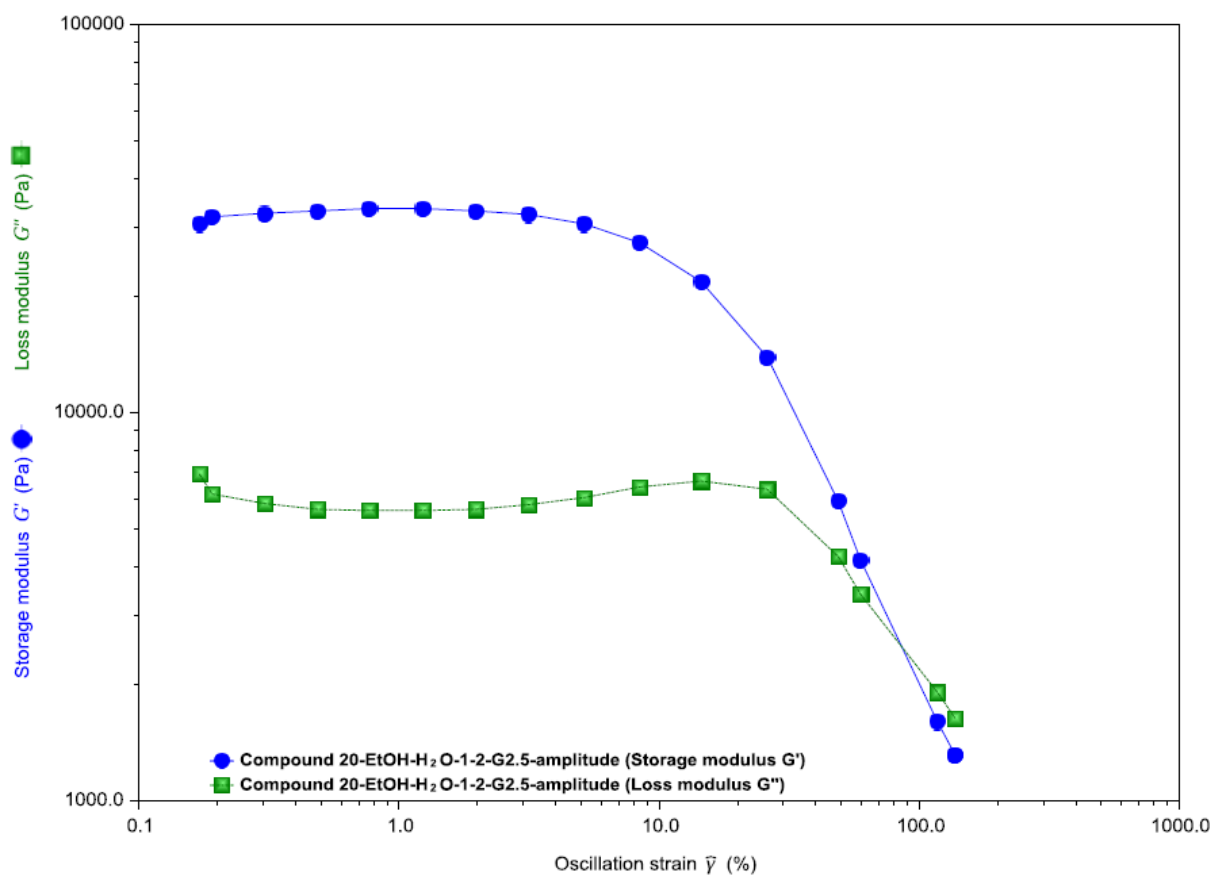

Figure S5-3. Rheological properties of the amplitude sweep experiment for the gel formed by compound **20** in EtOH:H<sub>2</sub>O (v/v 1/2).

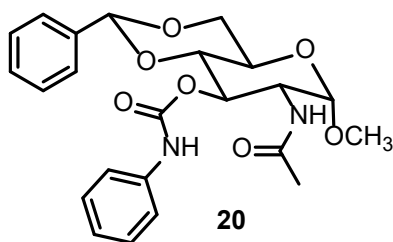

DMSO:H<sub>2</sub>O=1:1  
4.0 mg/mL opaque

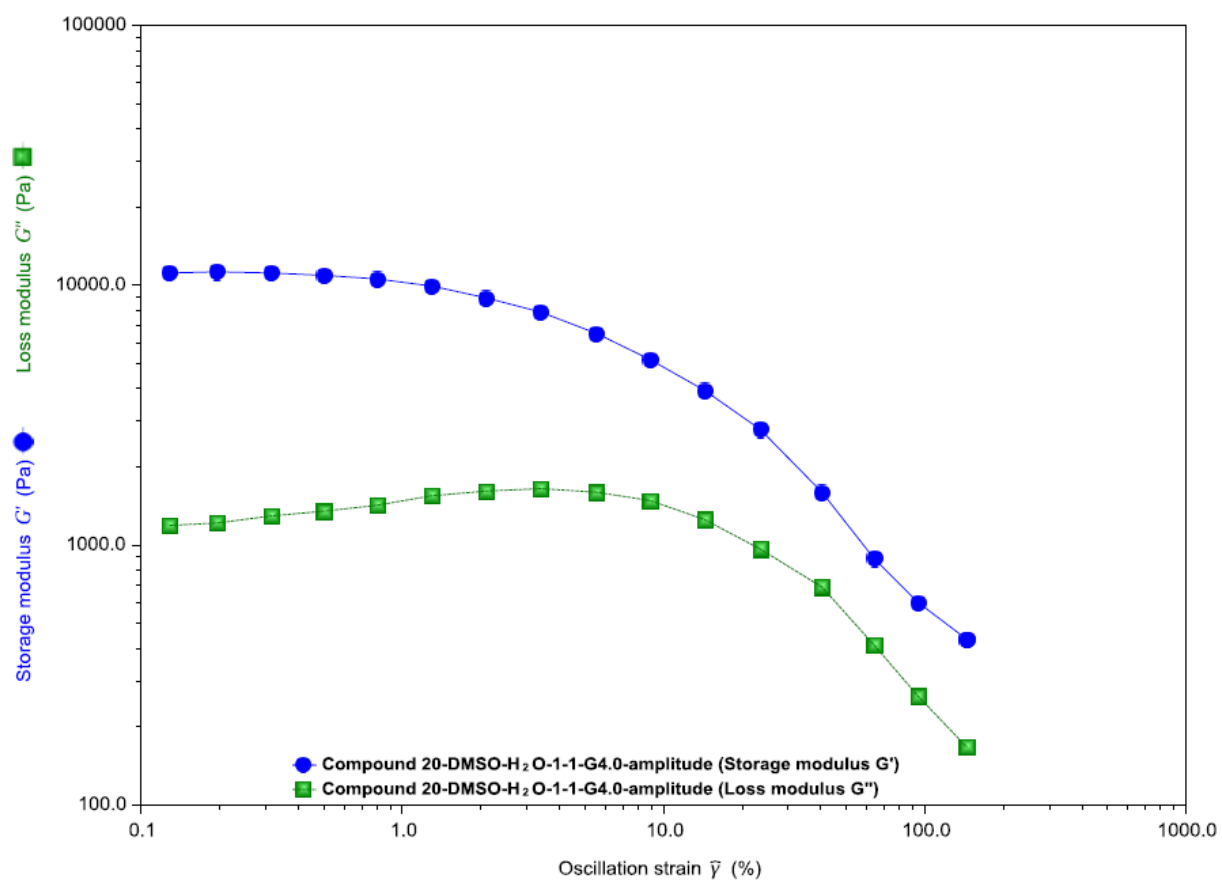

Figure S5-4. Rheological properties of the amplitude sweep experiment for the gel formed by compound **20** in DMSO:H<sub>2</sub>O (v/v 1/1).

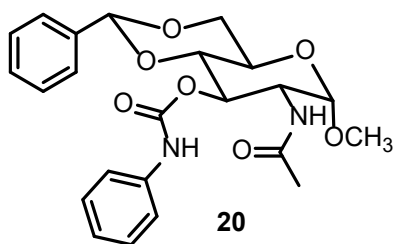

Toluene  
2.8 mg/mL opaque

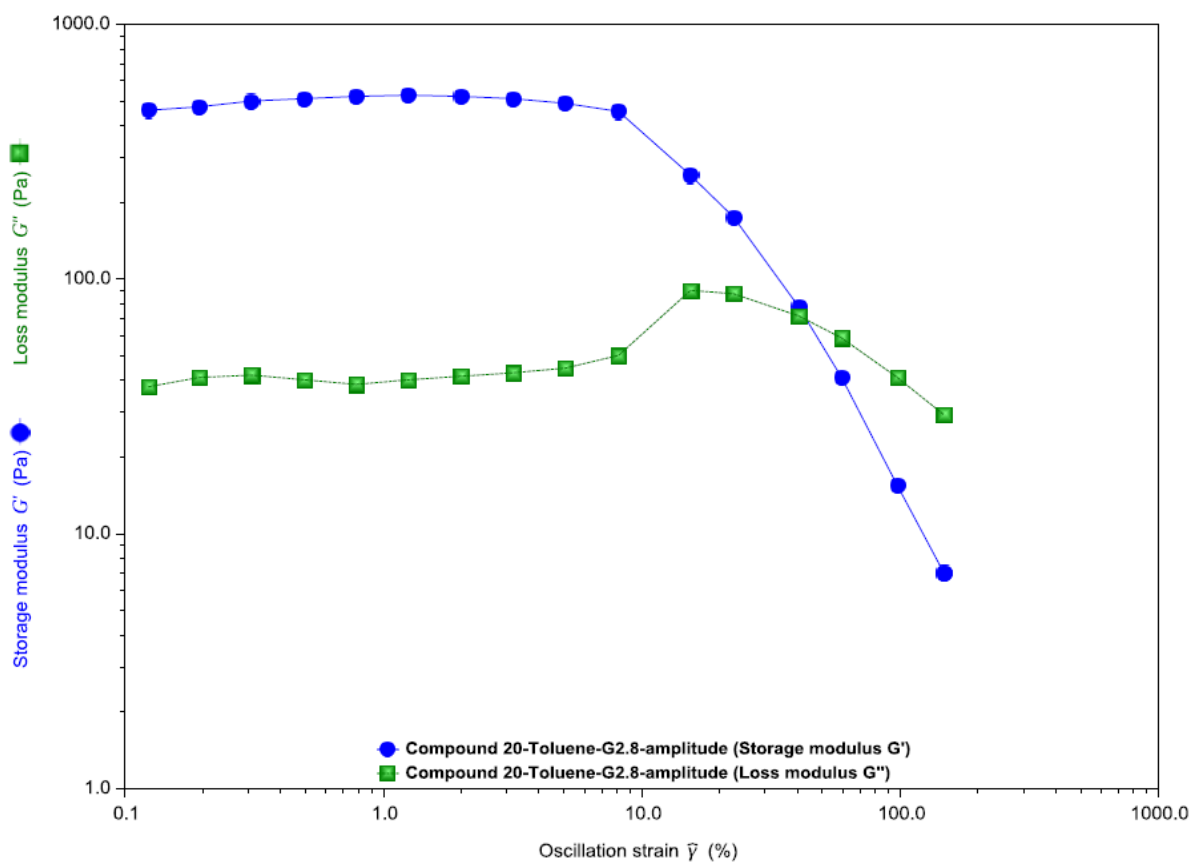

Figure S5-5. Rheological properties of the amplitude sweep experiment for the gel formed by compound **20** in Toluene.

6.  $^1\text{H}$  NMR spectra of compounds **13** and **20** at different temperatures

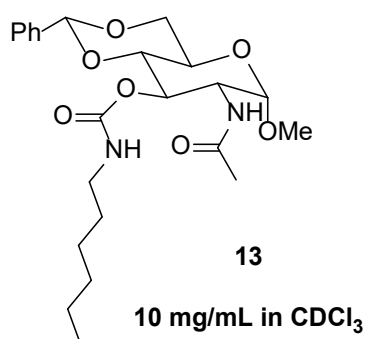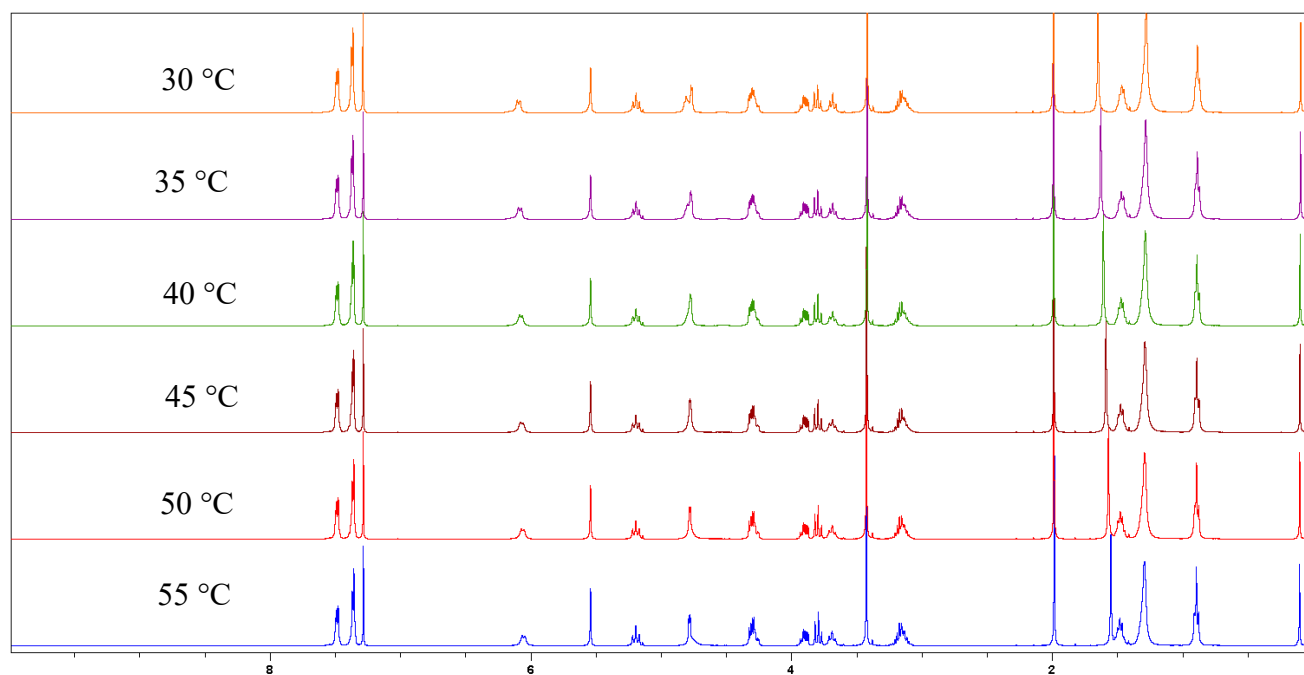

Figure S6. The  $^1\text{H}$  NMR spectra (0 to 10.0 ppm) of compound **13** from 30 °C to 55 °C in  $\text{CDCl}_3$  (10.0 mg/mL).

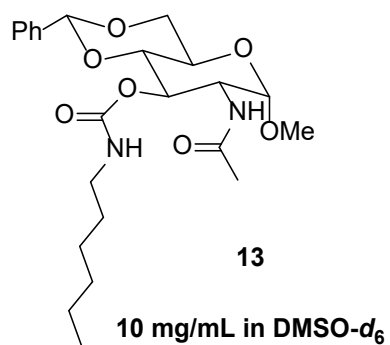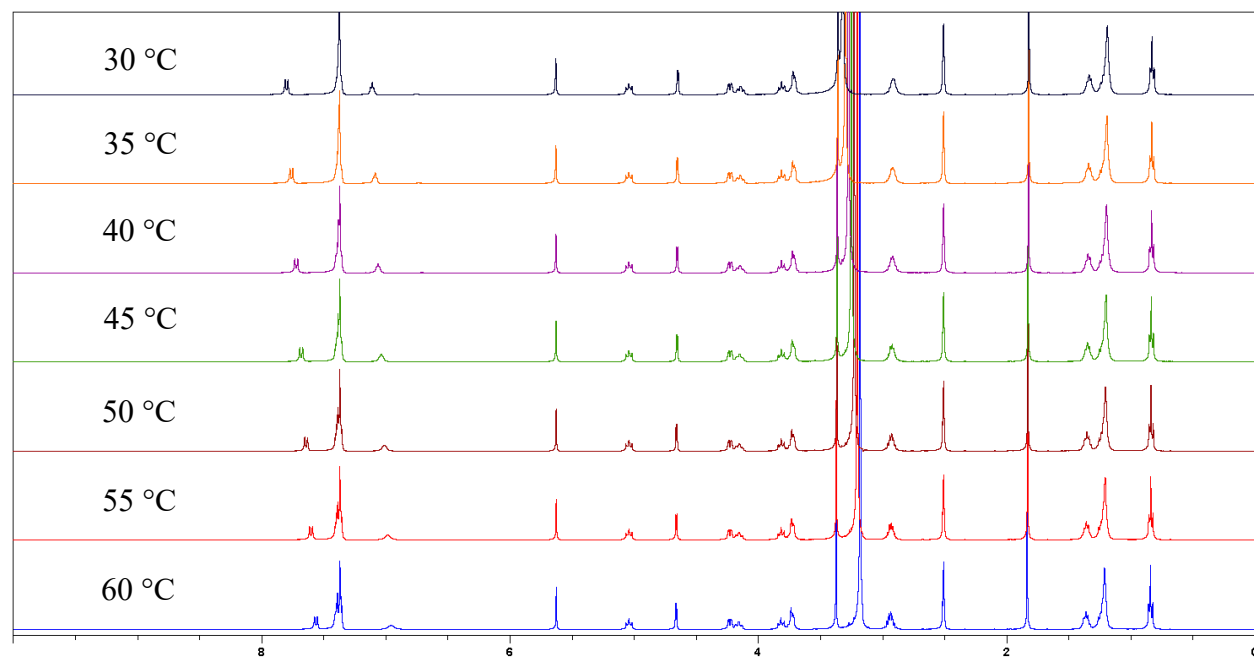

Figure S7. The <sup>1</sup>H NMR spectra (0 to 10.0 ppm) of compound **13** from 30 °C to 60 °C in DMSO-*d*<sub>6</sub> (10.0 mg/mL).

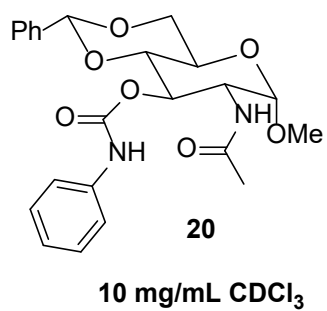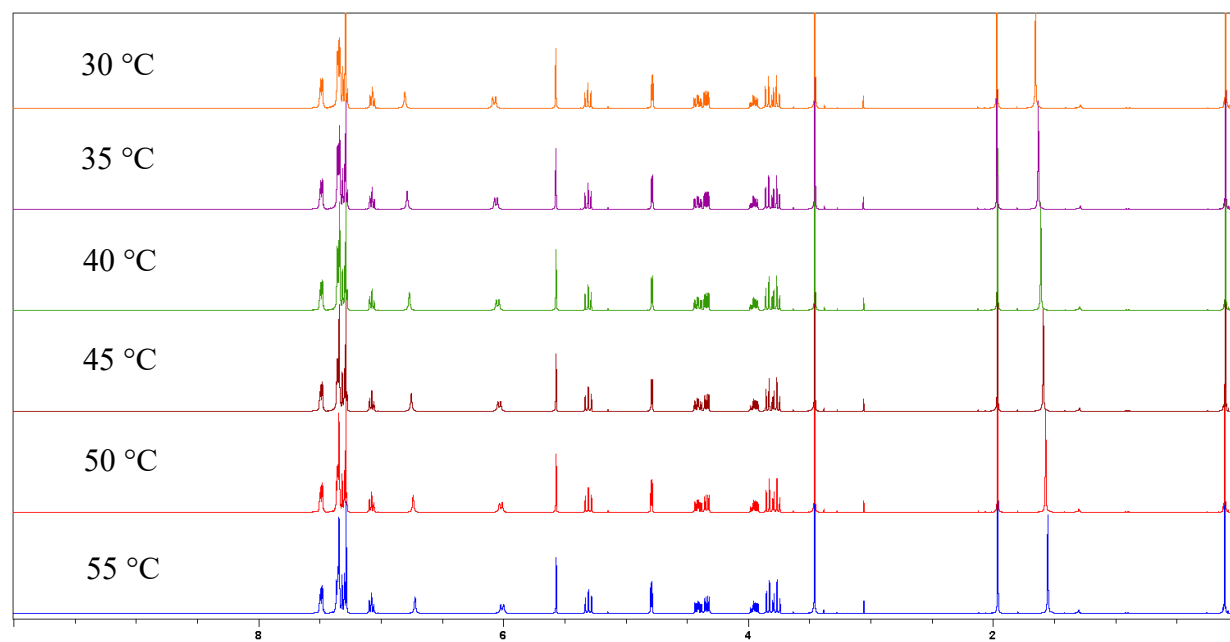

Figure S8. The <sup>1</sup>H NMR spectra (0 to 10.0 ppm) of compound **20** from 30 °C to 55 °C in CDCl<sub>3</sub> (10.0 mg/mL).

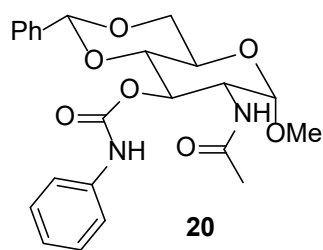

10 mg/mL DMSO- $d_6$

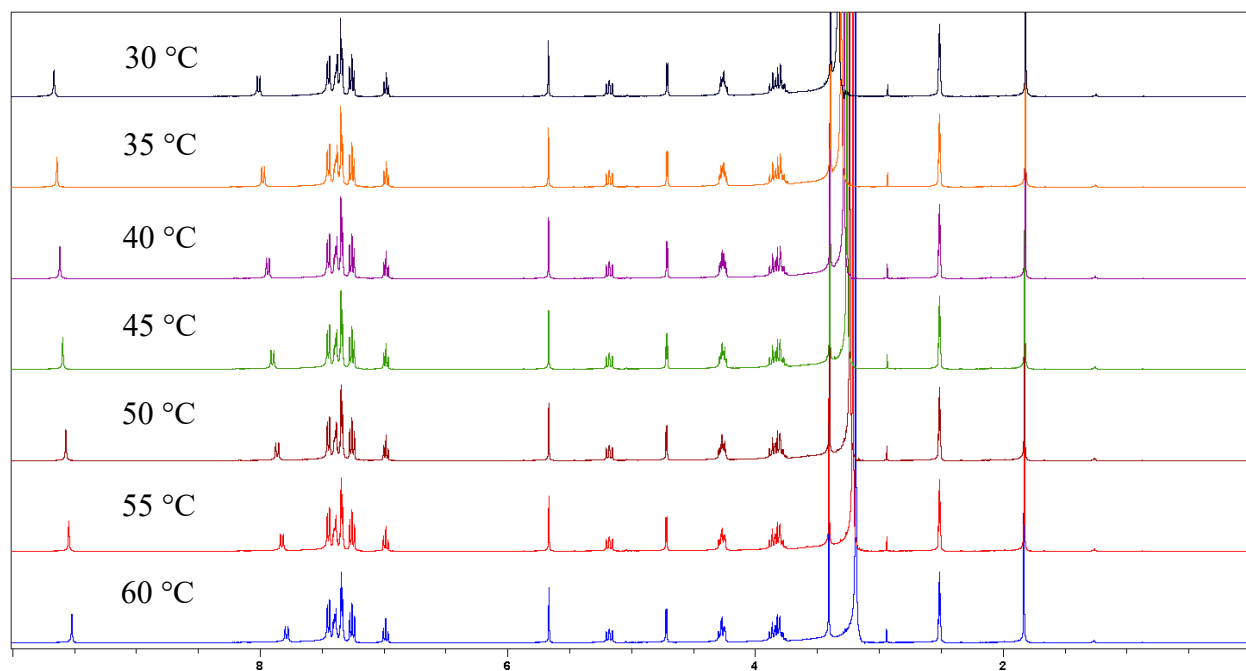

Figure S9. The  $^1\text{H}$  NMR spectra (0 to 10.0 ppm) of compound **20** from 30 °C to 60 °C in DMSO- $d_6$  (10.0 mg/mL).

## 7. NMR studies of compound **18** with tetrabutylammonium bromide

The NMR spectra of gelator **18** with different amounts of TBABr were obtained in two different solvents, CDCl<sub>3</sub> and acetone-*d*<sub>6</sub>.

Sample preparation: Compound **18** (3.8 mg, 0.0079 mmol, 1 eq.) was dissolved in 0.45 mL CDCl<sub>3</sub> or 0.8 mL acetone-*d*<sub>6</sub> in a standard NMR tube. Different amounts of TBABr salt was added to the NMR tube, it was sonicated to ensure that all of the salt was dissolved and the <sup>1</sup>H NMR spectrum was analyzed after each addition.

|   | Amount of TBABr              |
|---|------------------------------|
| 1 | 0 eq.                        |
| 2 | 2.5 mg, 0.0079 mmol, 1 eq.   |
| 3 | 5.1 mg, 0.0158 mmol, 2 eq.   |
| 4 | 7.6 mg, 0.0237 mmol, 3 eq.   |
| 5 | 12.7 mg, 0.0395 mmol, 5 eq.  |
| 6 | 25.5 mg, 0.0790 mmol, 10 eq. |
| 7 | 38.2 mg, 0.1185 mmol, 15 eq. |

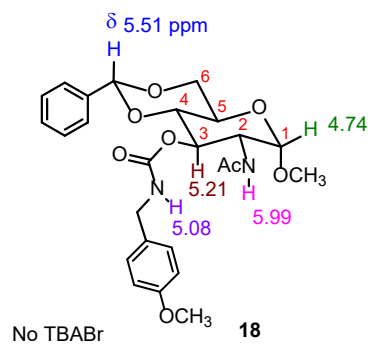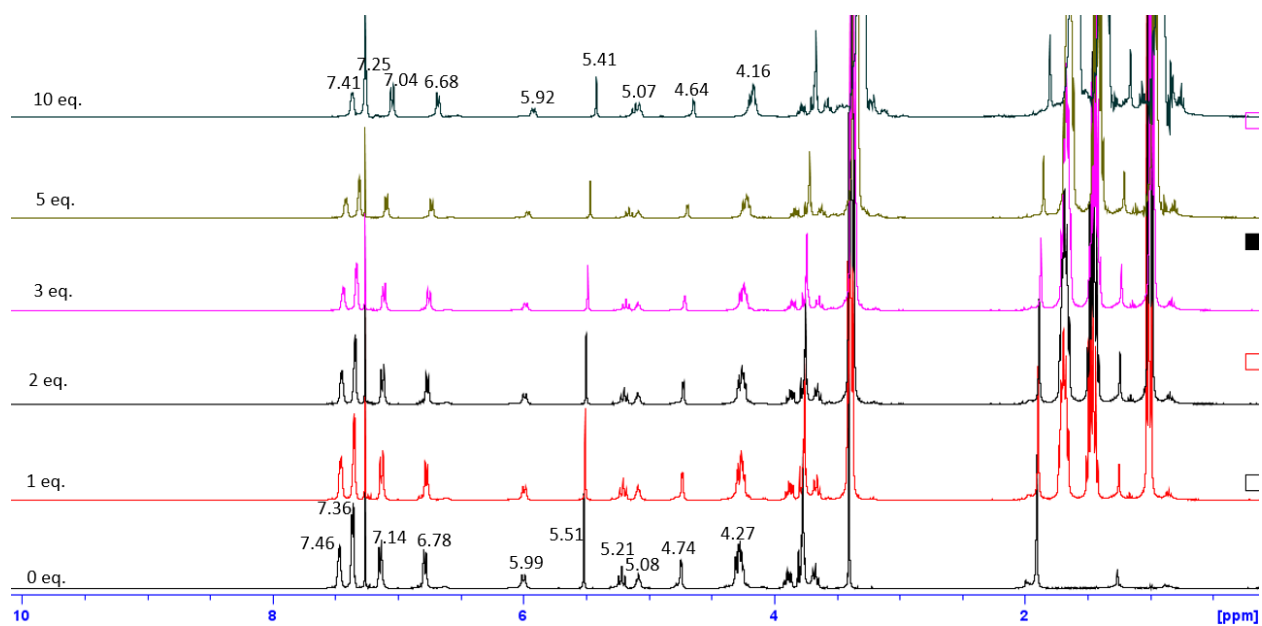

Figure S10a.  $^1\text{H}$  NMR spectra (0-10.0 ppm) of gelator **18** in  $\text{CDCl}_3$  with different amounts (0-10 eq.) of TBABr.

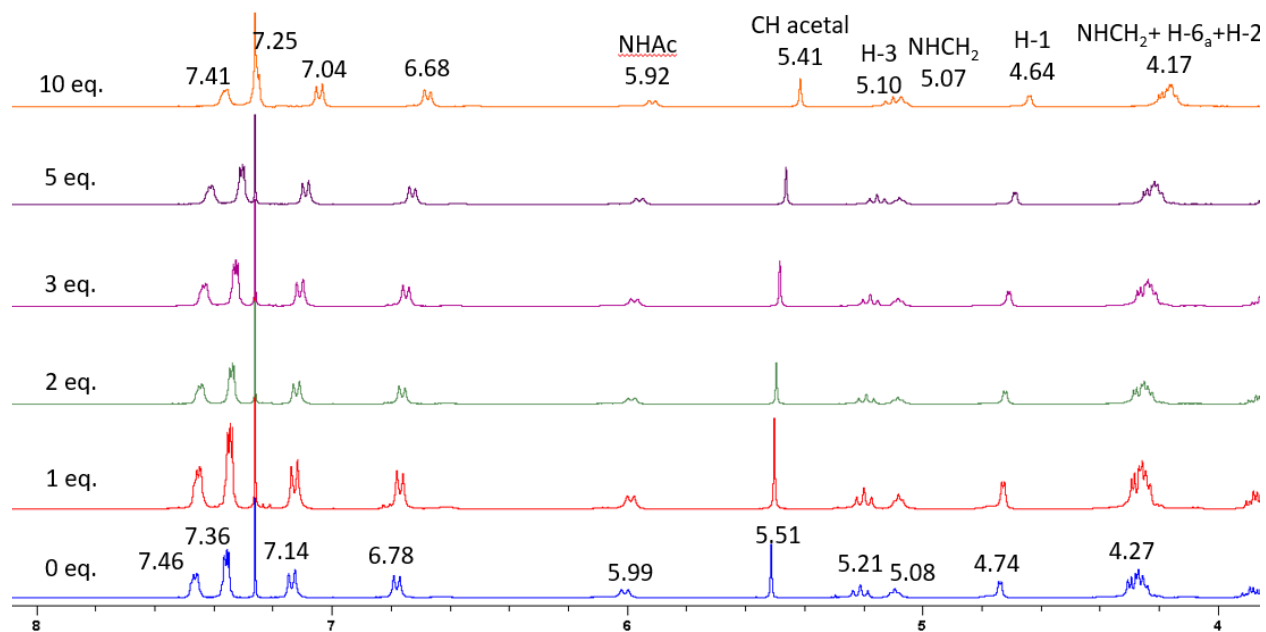

Figure S10b.  $^1\text{H}$  NMR spectra 4.0-8.0 ppm of gelator **18** in  $\text{CDCl}_3$  with different amounts (0-10 eq.) of TBABr.

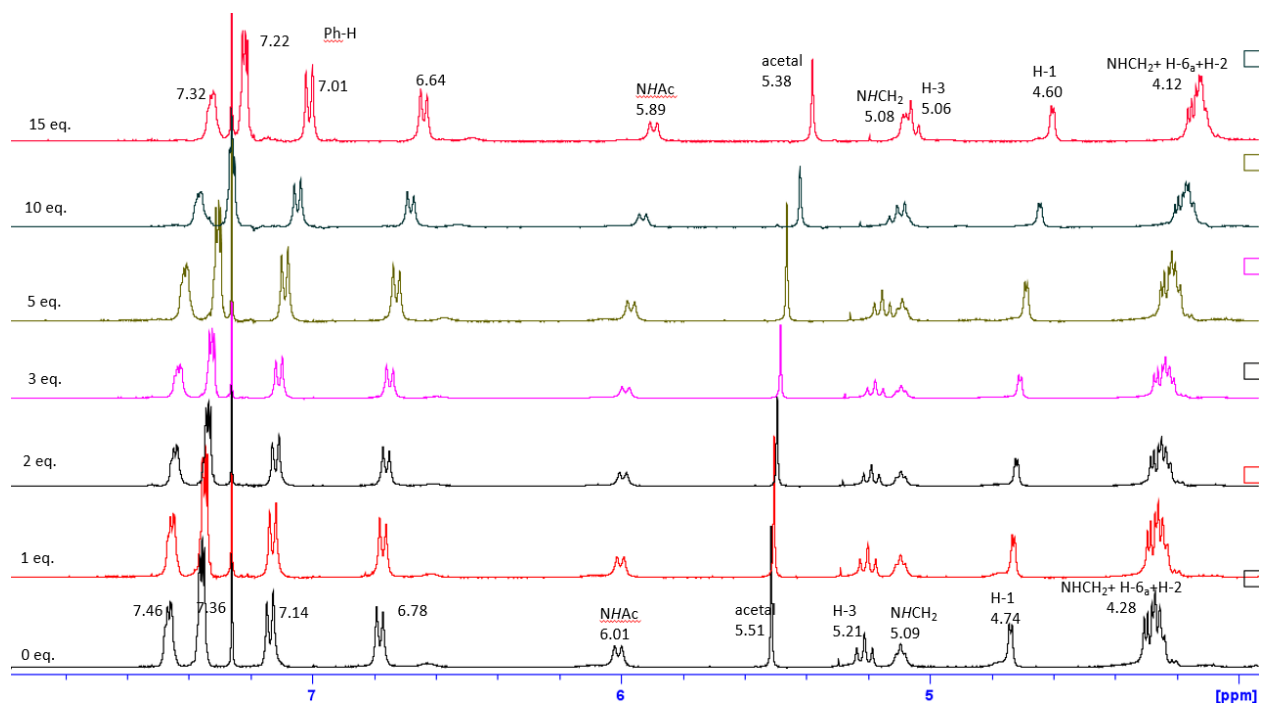

Figure S11.  $^1\text{H}$  NMR spectra of gelator **18** in  $\text{CDCl}_3$  with different amounts (0-15 eq.) of TBABr.

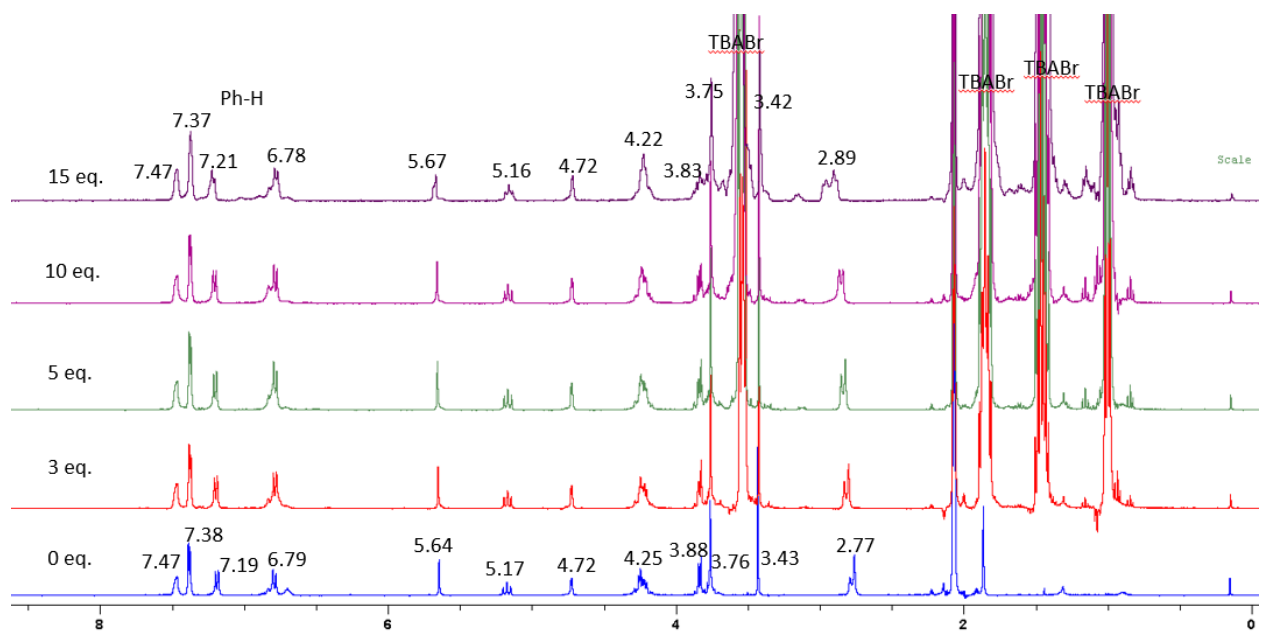

Figure S12.  $^1\text{H}$  NMR spectra of gelator **18** in  $\text{acetone-}d_6$  with different amounts (0-15 eq.) of TBABr.

## 8. NMR studies of compound **20** with tetrabutylammonium bromide

Compound **20** (3.5 mg, 0.0079mmol, 1 eq.) was dissolved in 0.45 mL of CDCl<sub>3</sub> or DMSO-*d*<sub>6</sub> in a NMR tube. Different amounts of the TBABr salt was added to the NMR tube, it was sonicated to ensure that all of the salt was dissolved and the <sup>1</sup>H NMR spectrum was analyzed after each addition.

|   | TBABr                        |
|---|------------------------------|
| 1 | 0 eq.                        |
| 2 | 2.5 mg, 0.0079 mmol, 1 eq.   |
| 3 | 5.1 mg, 0.0158 mmol, 2 eq.   |
| 4 | 7.6 mg, 0.0237 mmol, 3 eq.   |
| 5 | 12.7 mg, 0.0395 mmol, 5 eq.  |
| 6 | 25.5 mg, 0.0790 mmol, 10 eq. |

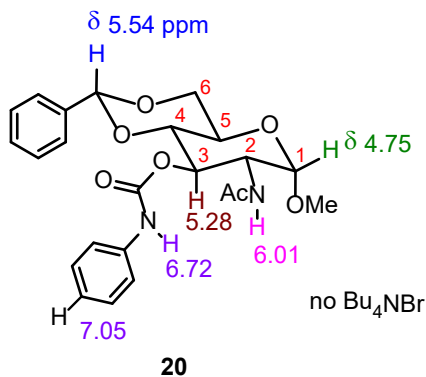

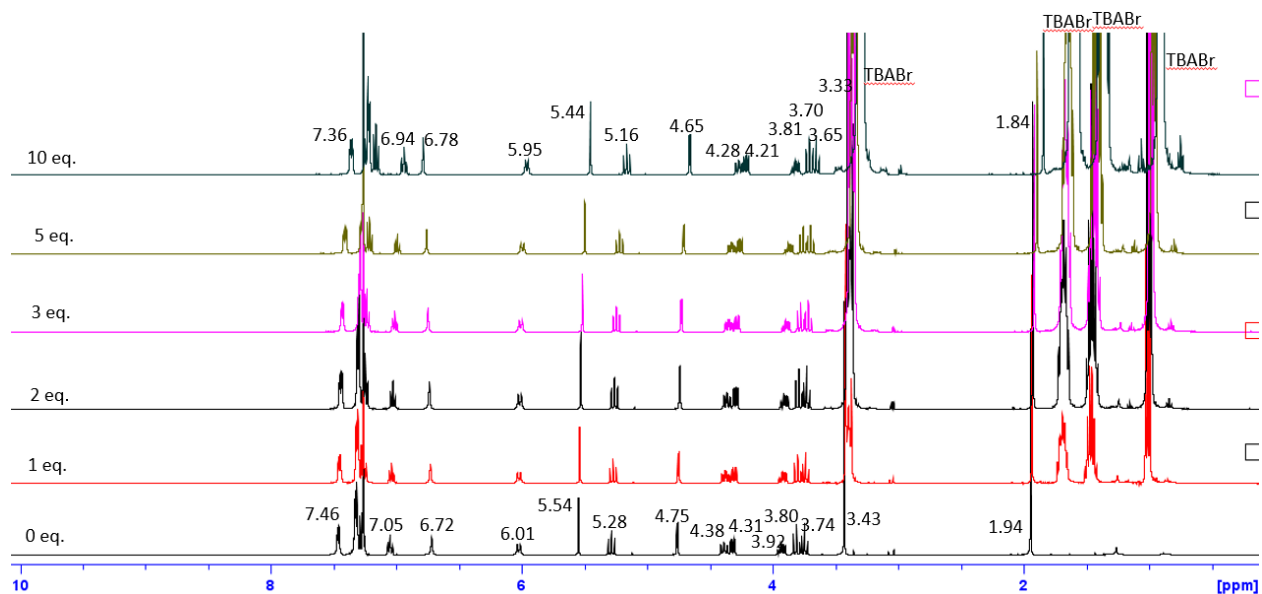

Figure S13a.  $^1\text{H}$  NMR spectra of gelator **20** in  $\text{CDCl}_3$  with different amounts of TBABr.

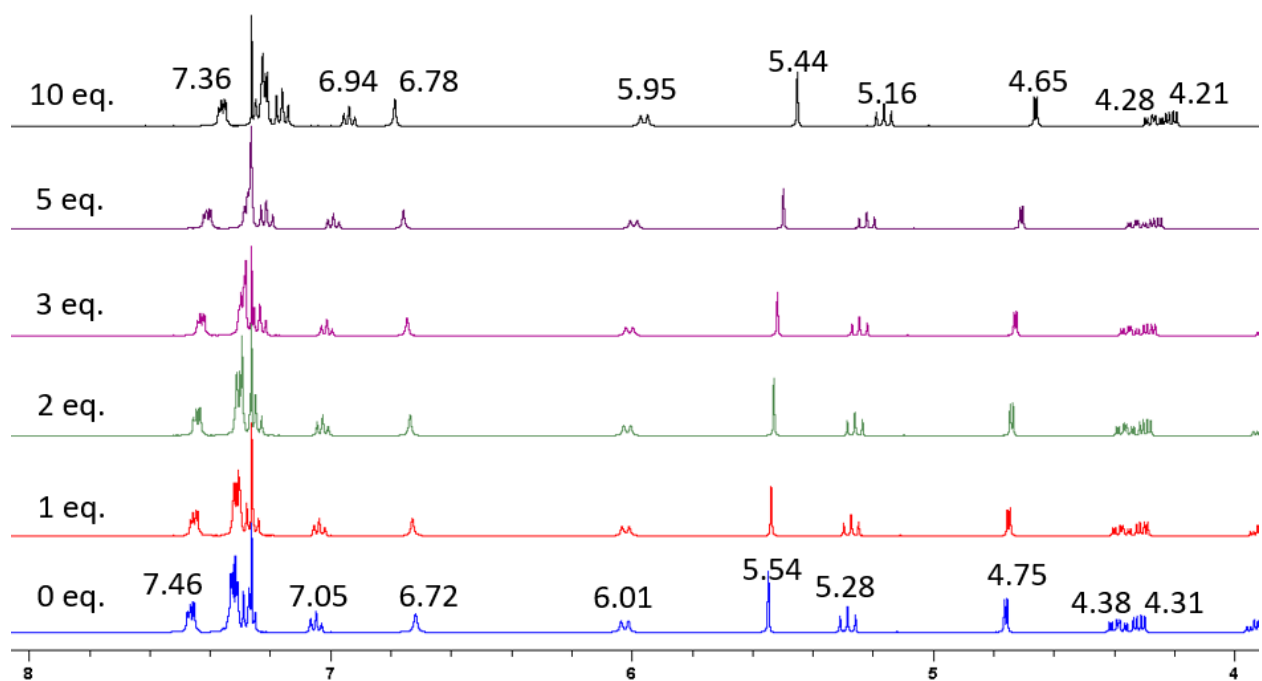

Figure S13b.  $^1\text{H}$  NMR spectra (4.0-8.0 ppm) of gelator **20** in  $\text{CDCl}_3$  with different amounts of TBABr.

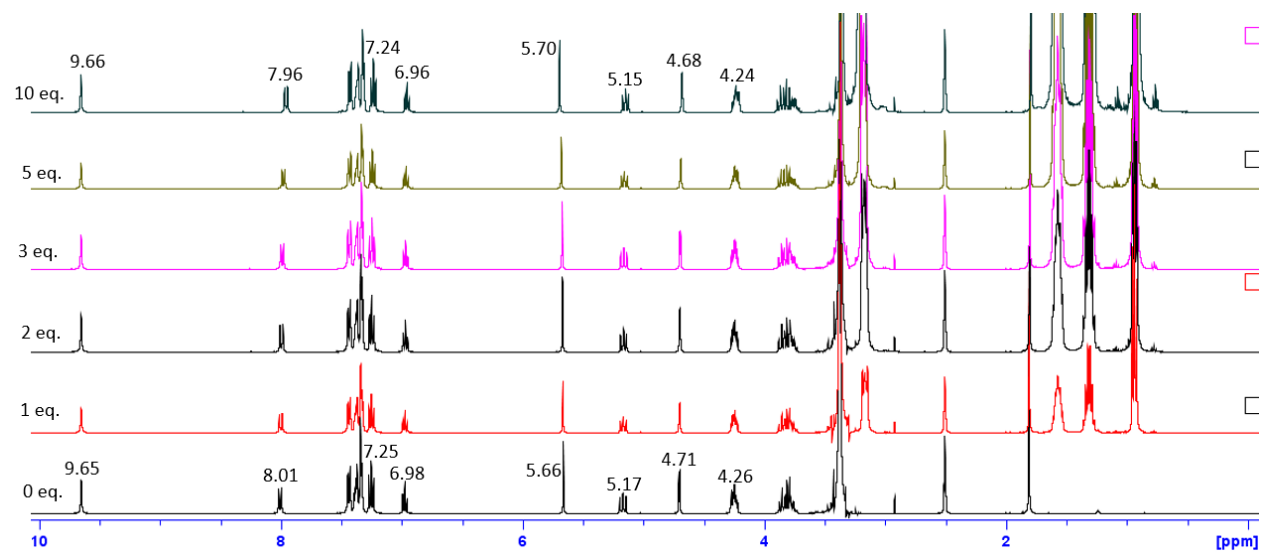

Figure S14a.  $^1\text{H}$  NMR spectra of gelator **20** in  $\text{DMSO-}d_6$  with different amounts (0-10 eq.) of TBABr.

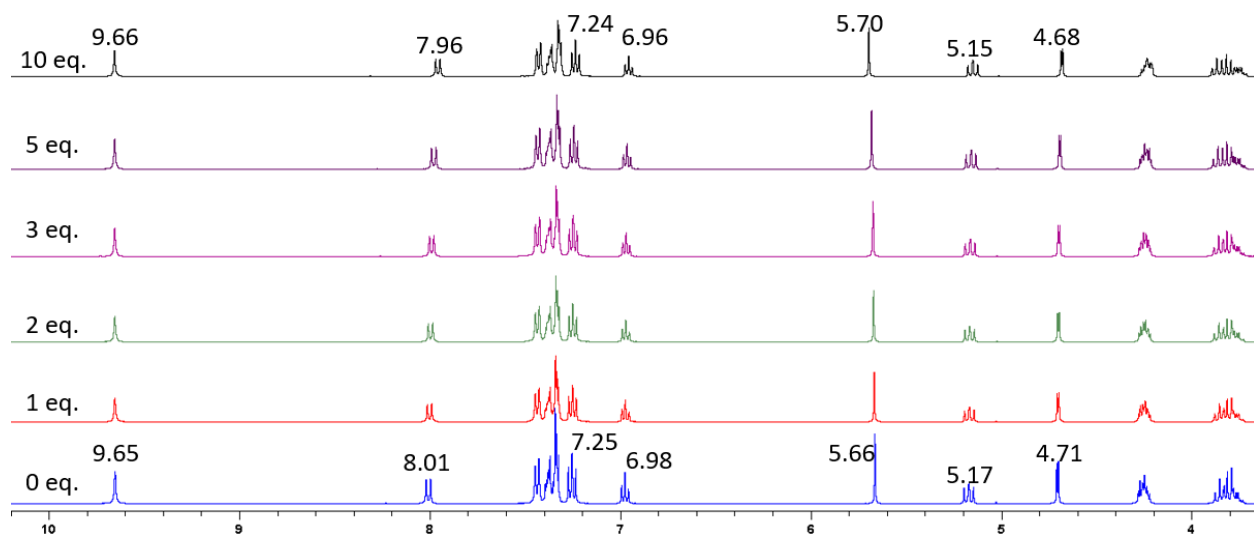

Figure S14b.  $^1\text{H}$  NMR spectra (4.0-10.0 ppm) of **20** in  $\text{DMSO-}d_6$  with different amounts (0-10 eq.) of TBABr.

## 9. Gel photos of naproxen release studies

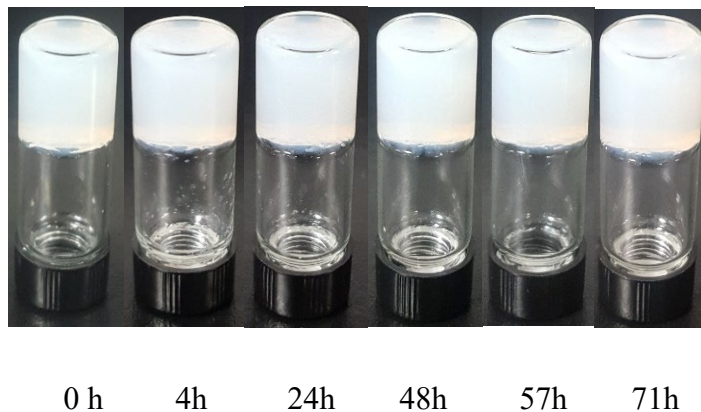

Figure S15. Gel pictures from the release study of naproxen from the gel formed by compound **20** (5.6 mg) in 2.0 mL of DMSO:H<sub>2</sub>O (v/v 1:7) with naproxen (0.25 mg) in the presence of phosphate buffered saline (1X concentrated) at pH 7.47 (2.0 mL) on top of the gel at different time points.

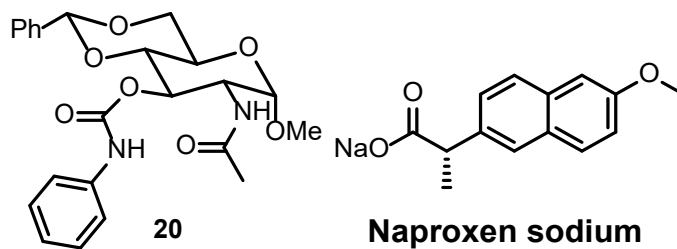

## Part II. $^1\text{H}$ and $^{13}\text{C}$ NMR spectra of synthesized carbamate derivatives

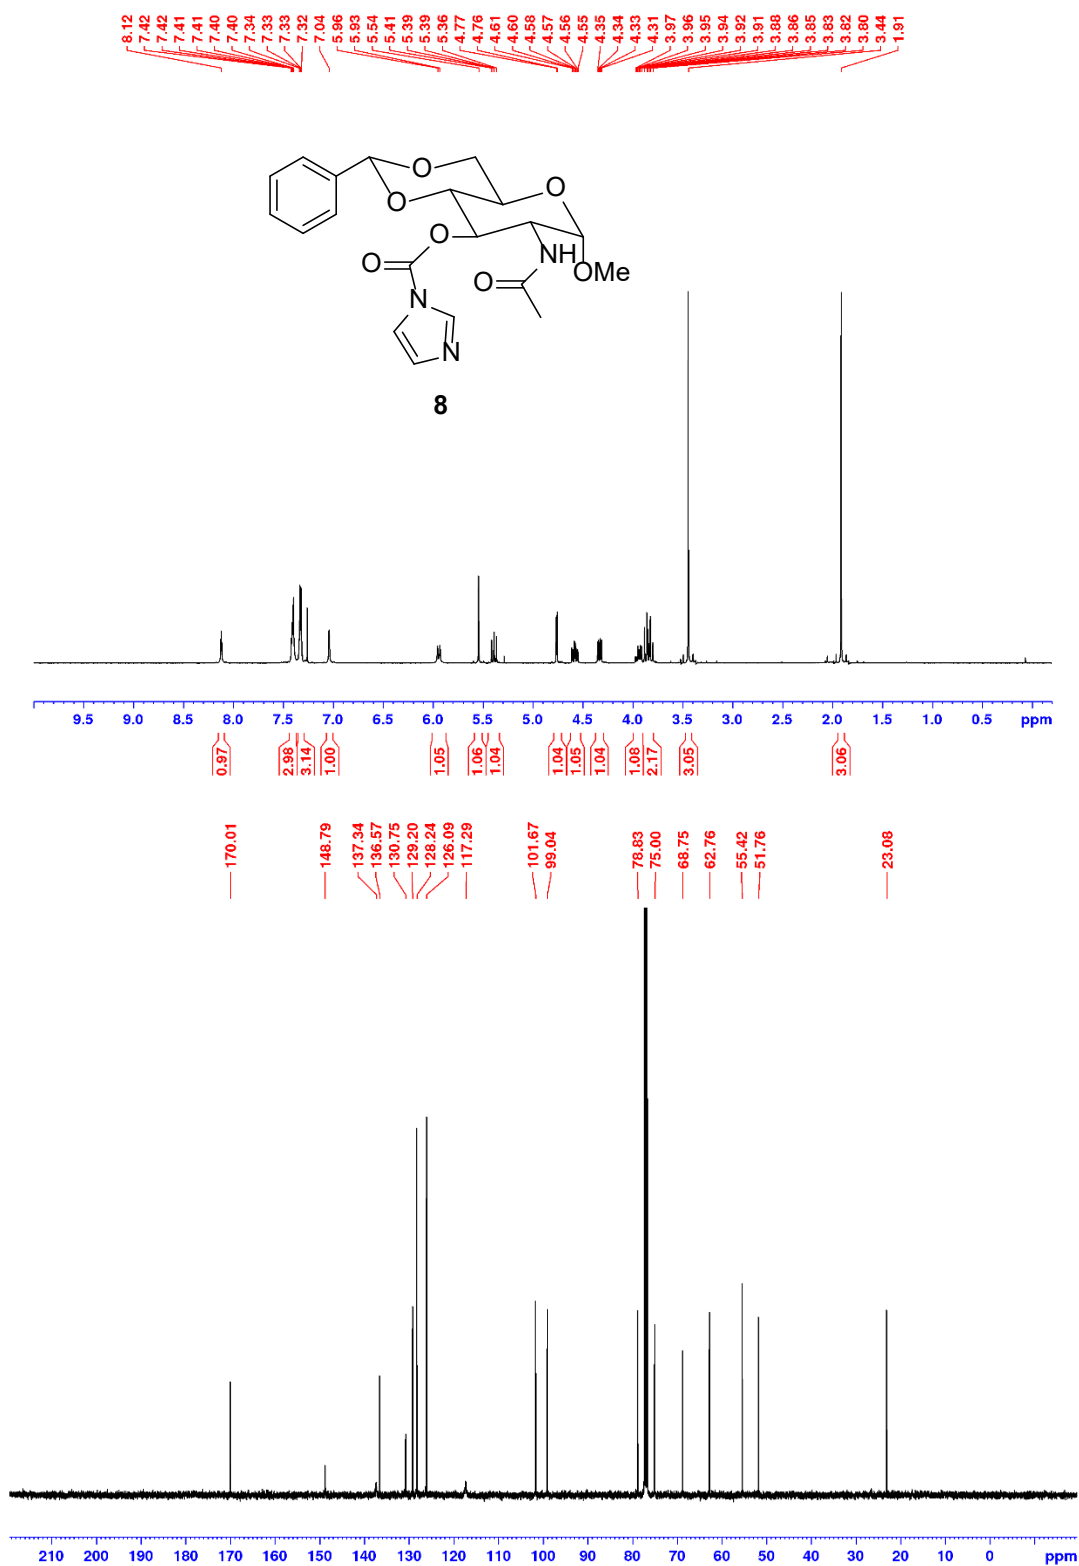

$^1\text{H}$  NMR and  $^{13}\text{C}$  NMR spectra of compound **8** in  $\text{CDCl}_3$

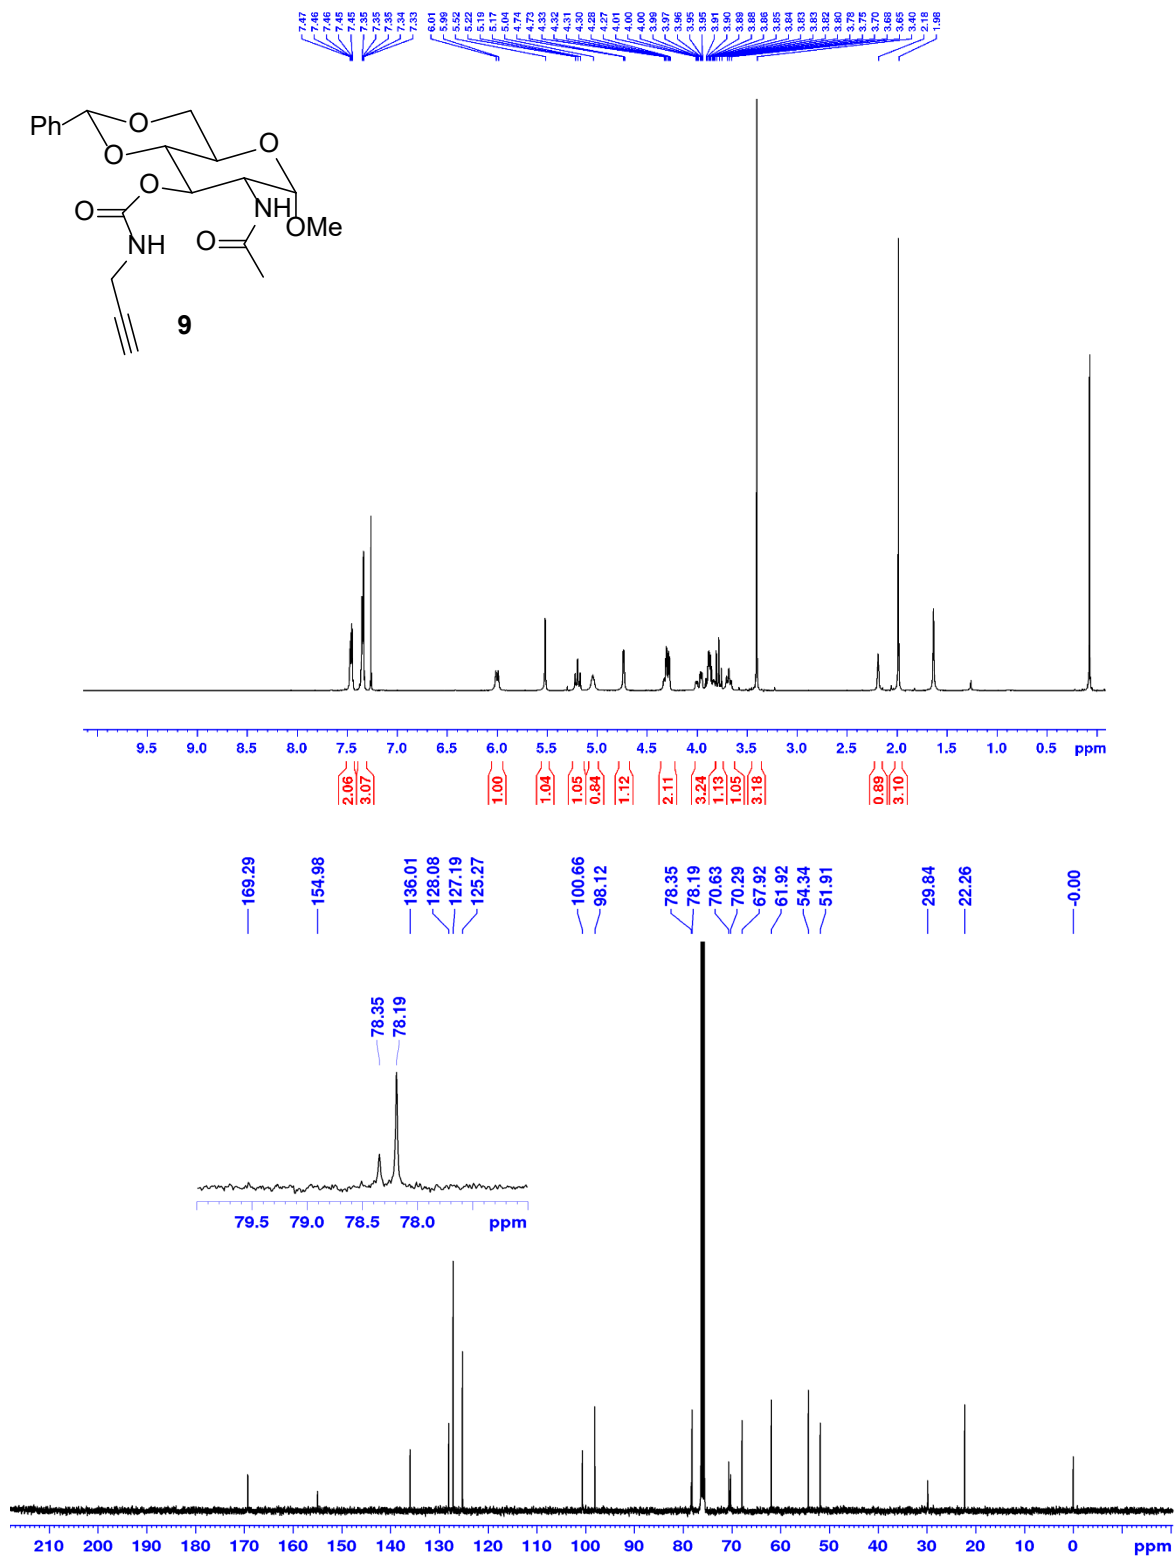

$^1\text{H}$  NMR and  $^{13}\text{C}$  NMR spectra of compound **9** in  $\text{CDCl}_3$

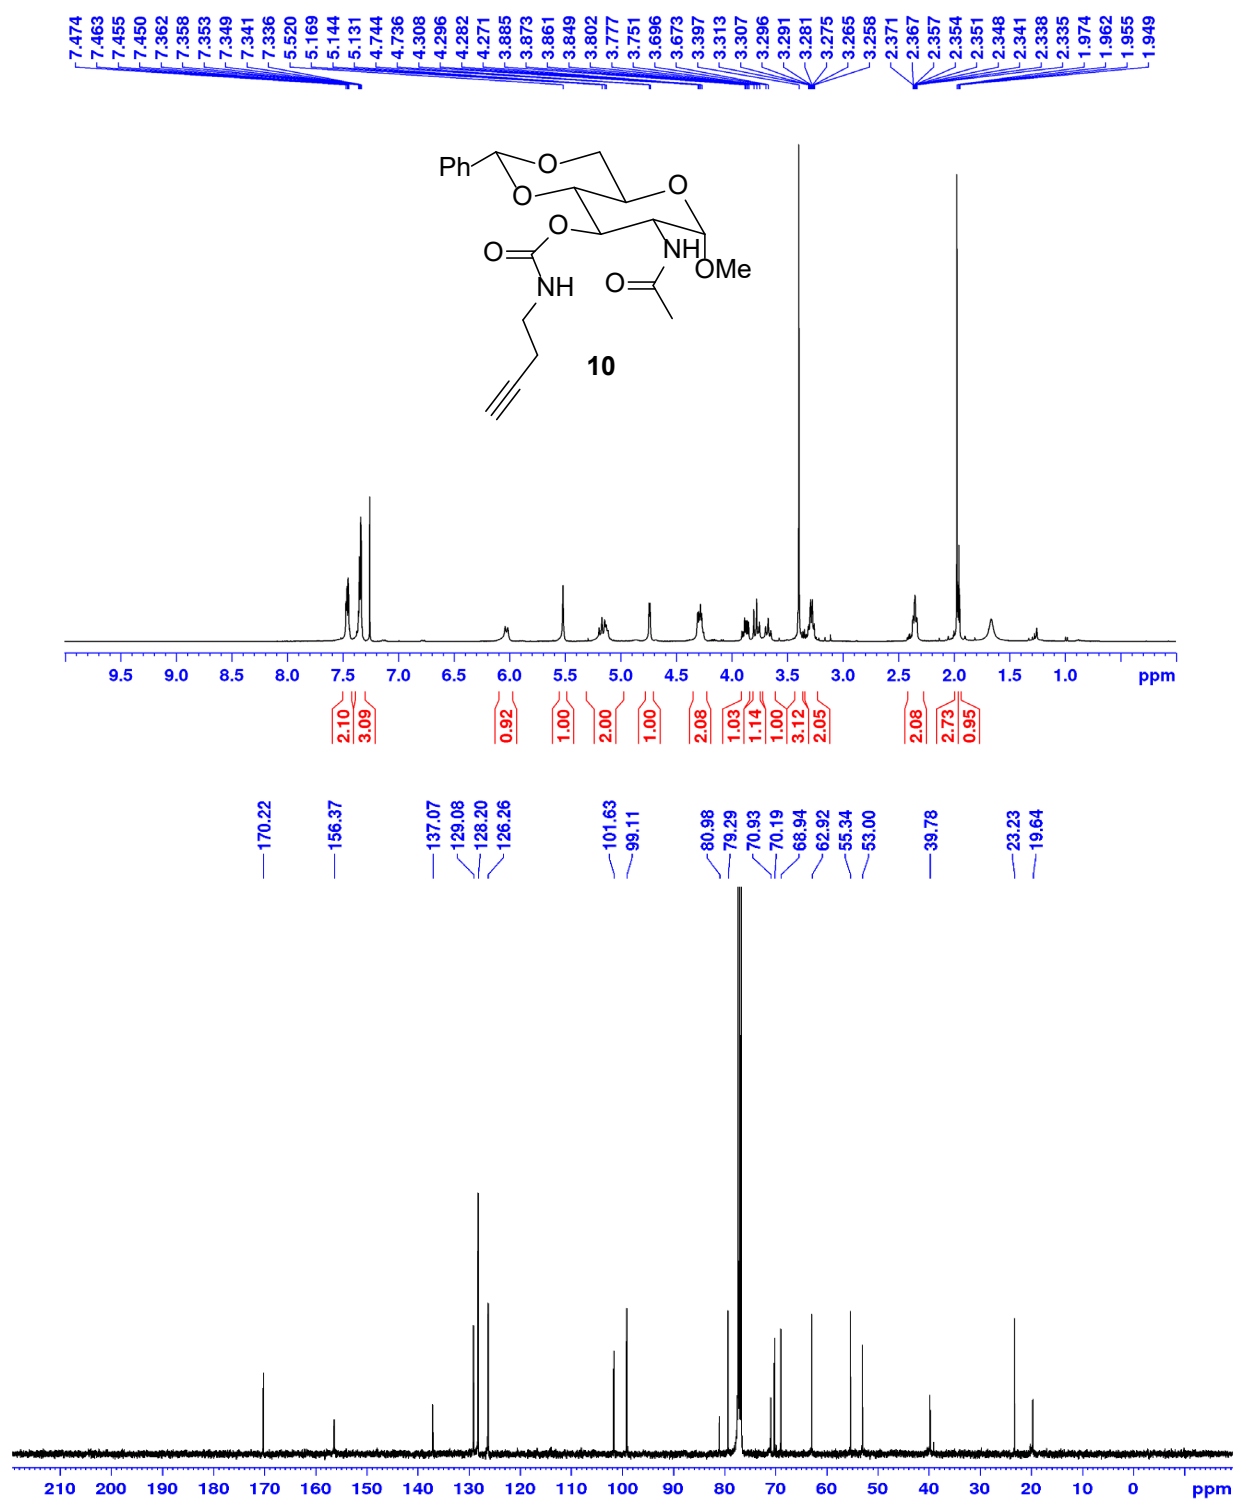

$^1\text{H}$  NMR and  $^{13}\text{C}$  NMR spectra of compound **10** in  $\text{CDCl}_3$

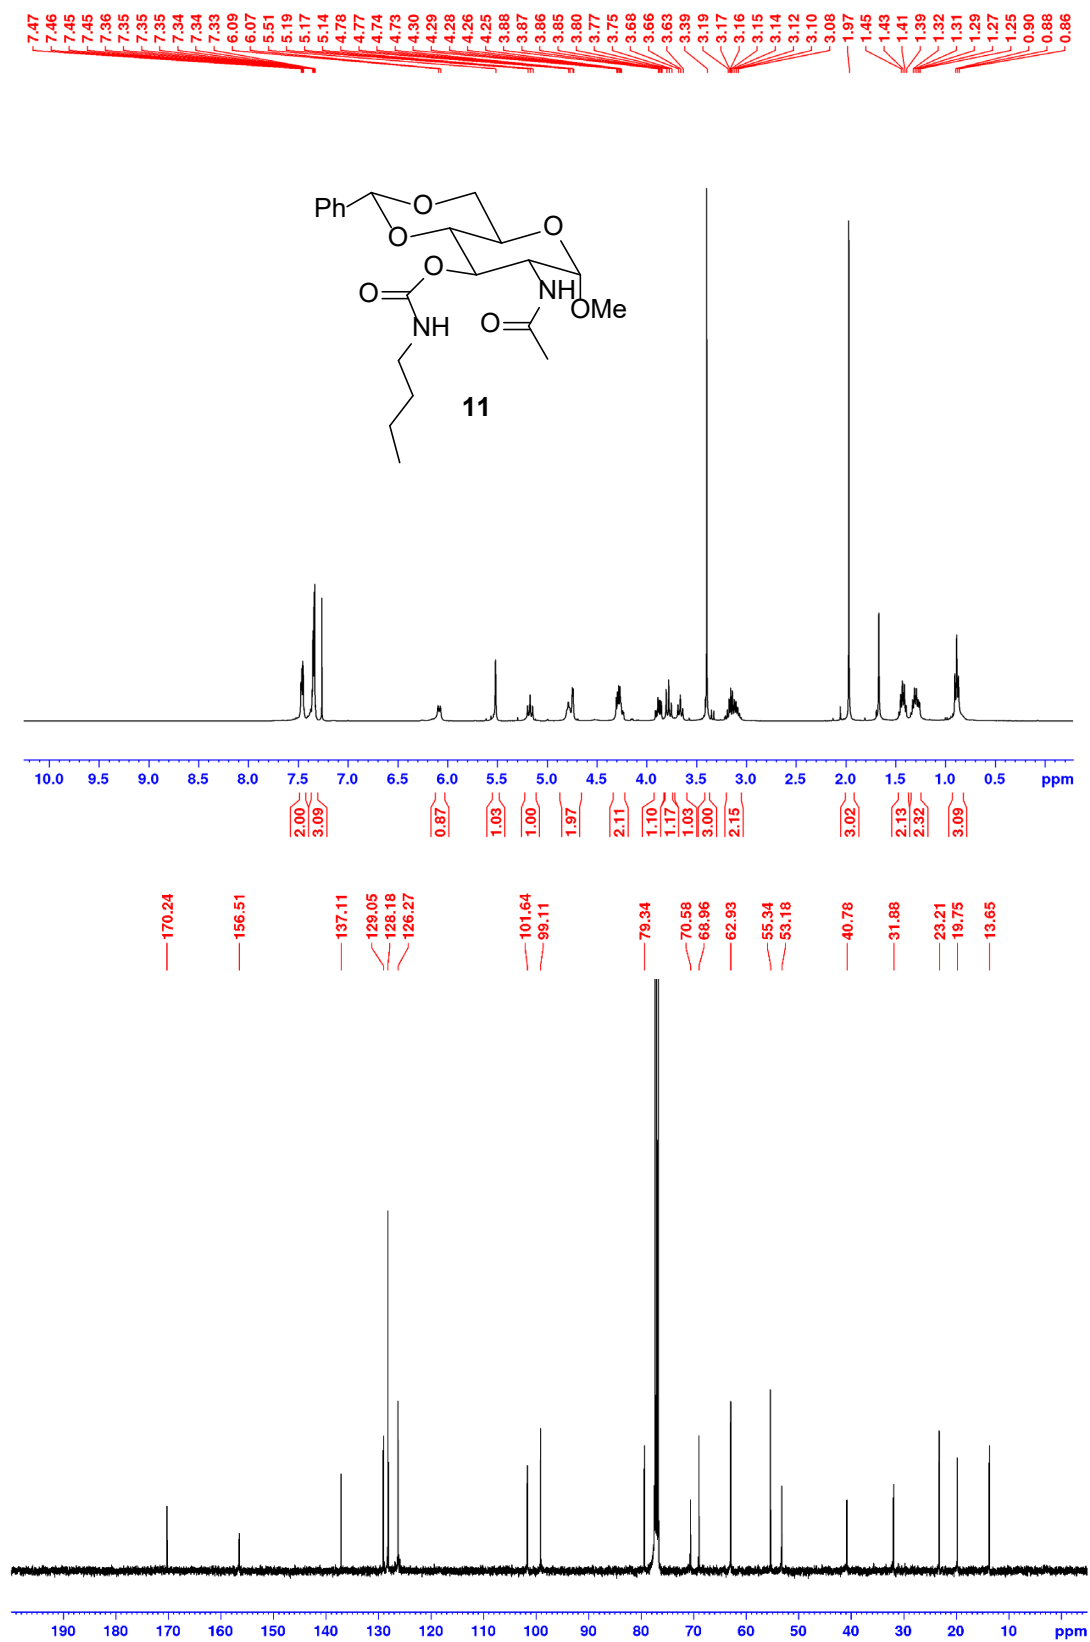

<sup>1</sup>H NMR and <sup>13</sup>C NMR spectra of compound **11** in CDCl<sub>3</sub>

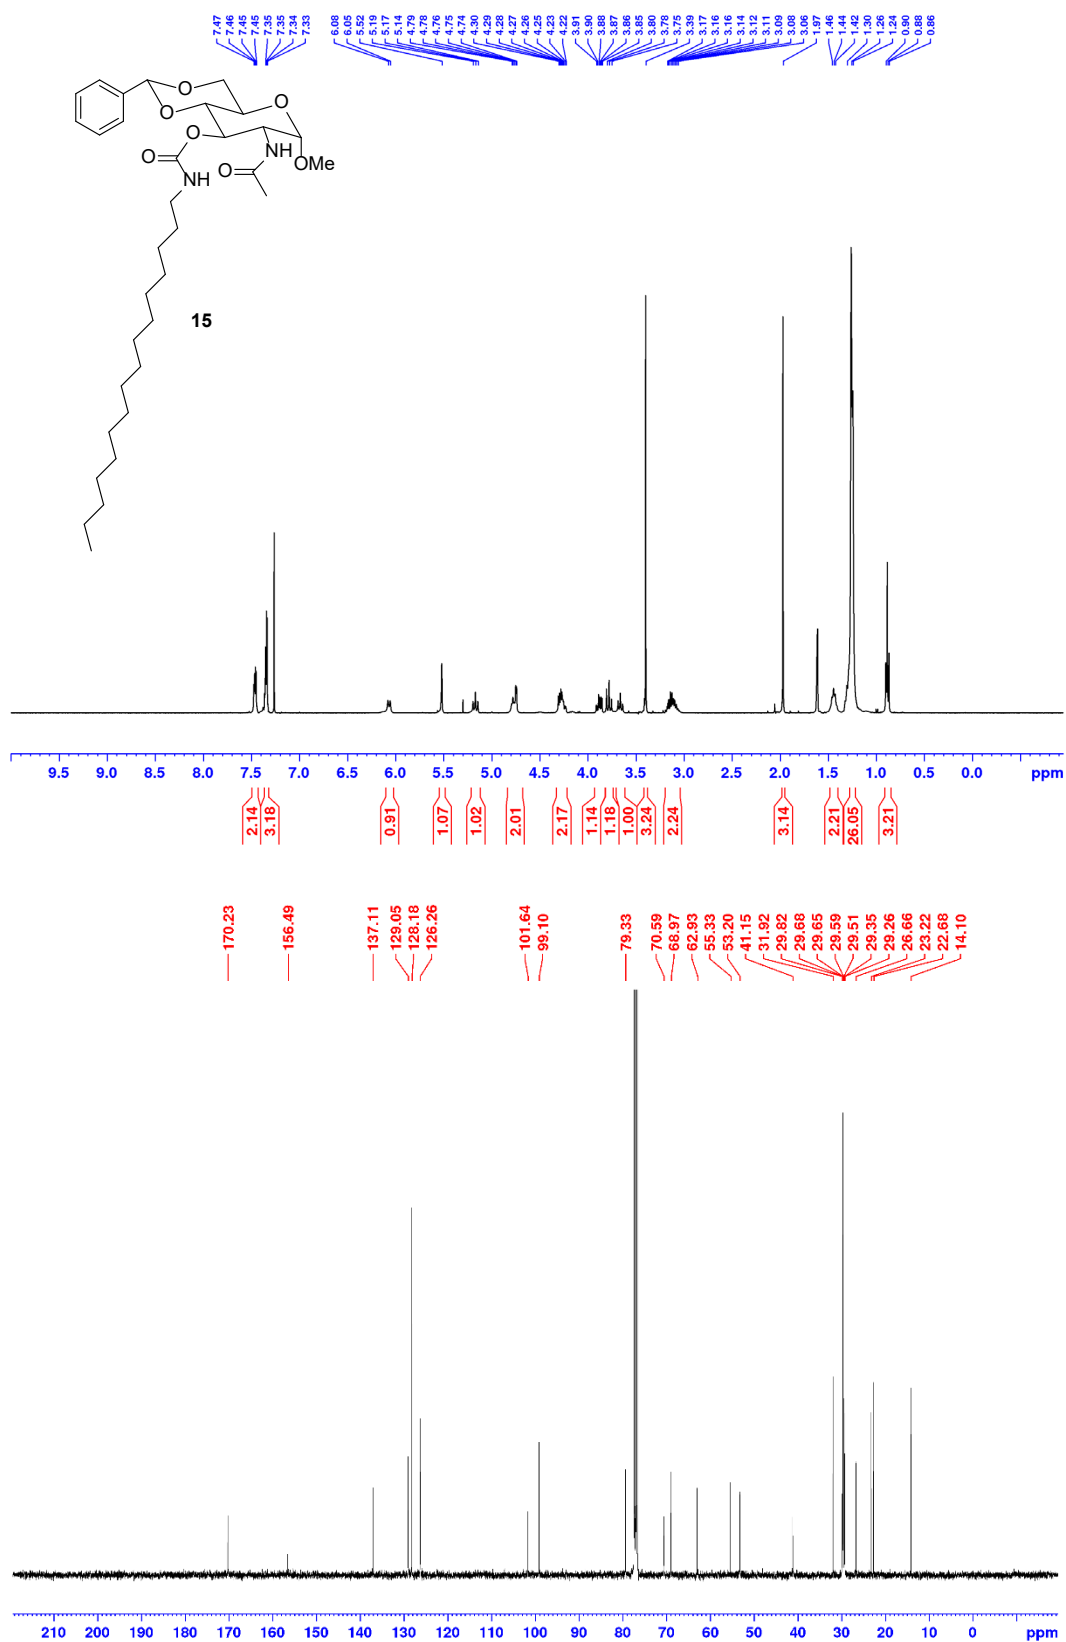

<sup>1</sup>H NMR and <sup>13</sup>C NMR spectra of compound **15** in CDCl<sub>3</sub>

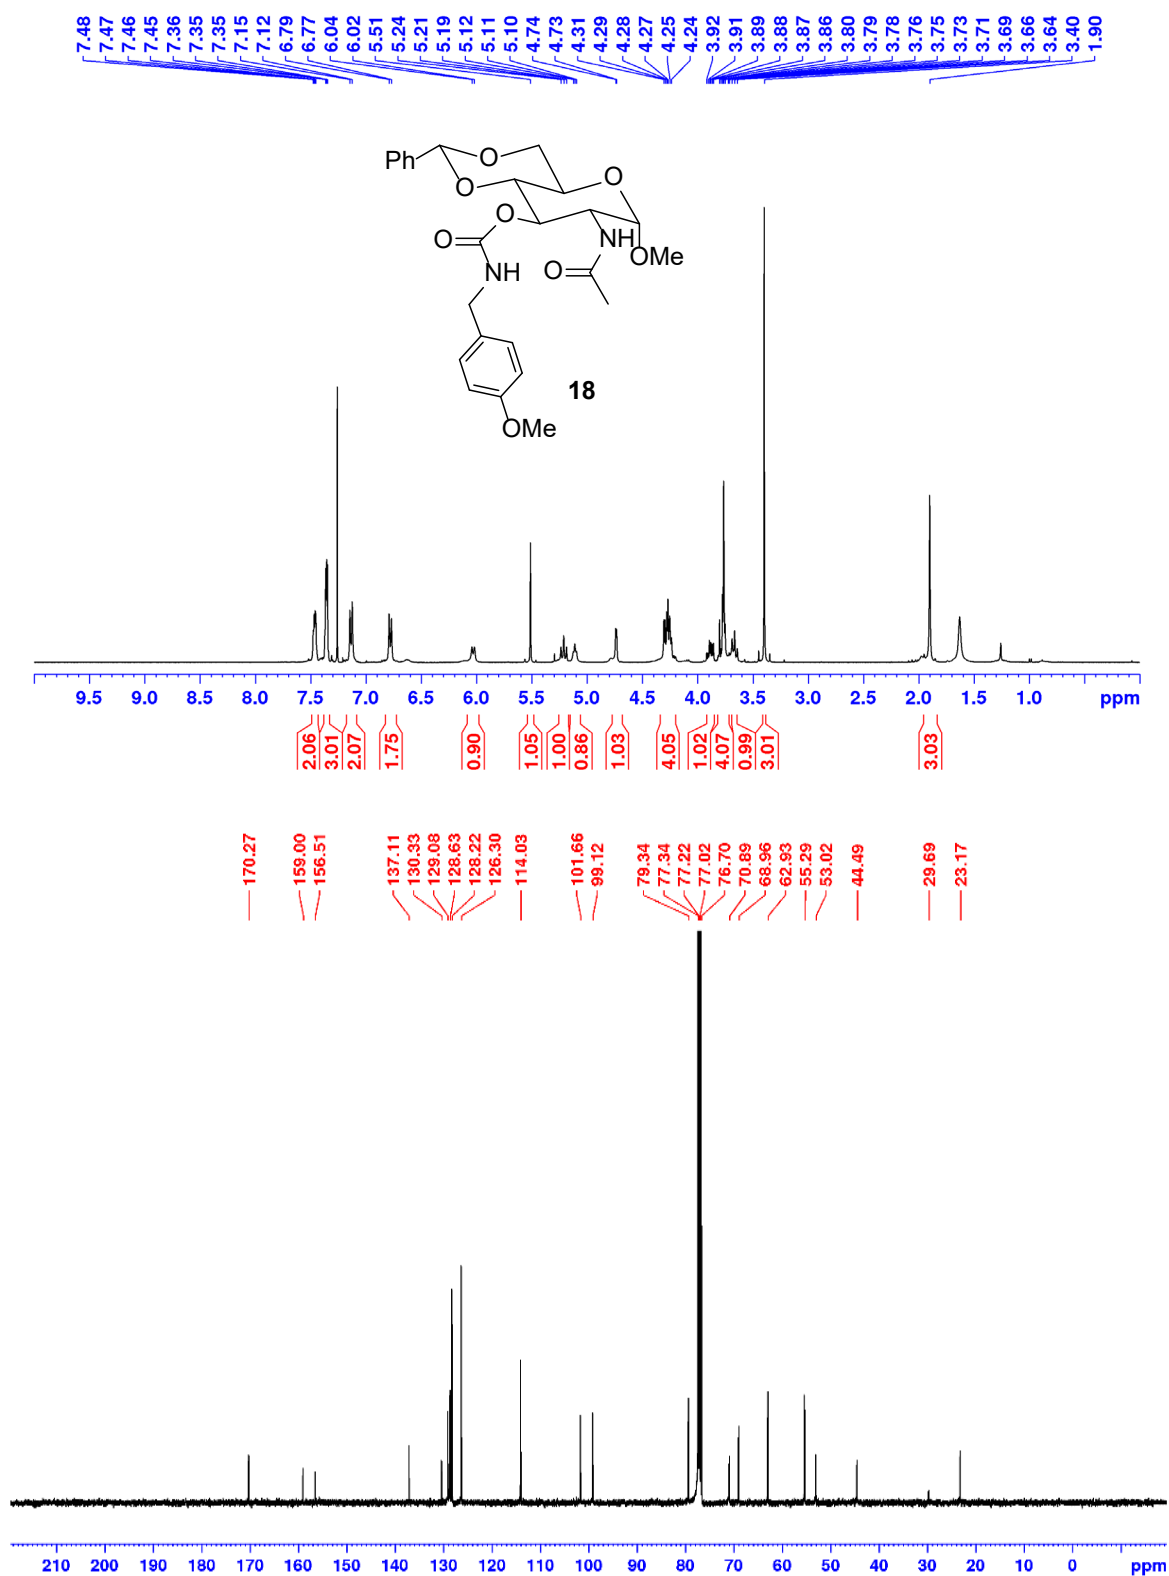

<sup>1</sup>H NMR and <sup>13</sup>C NMR spectra of compound **18** in CDCl<sub>3</sub>

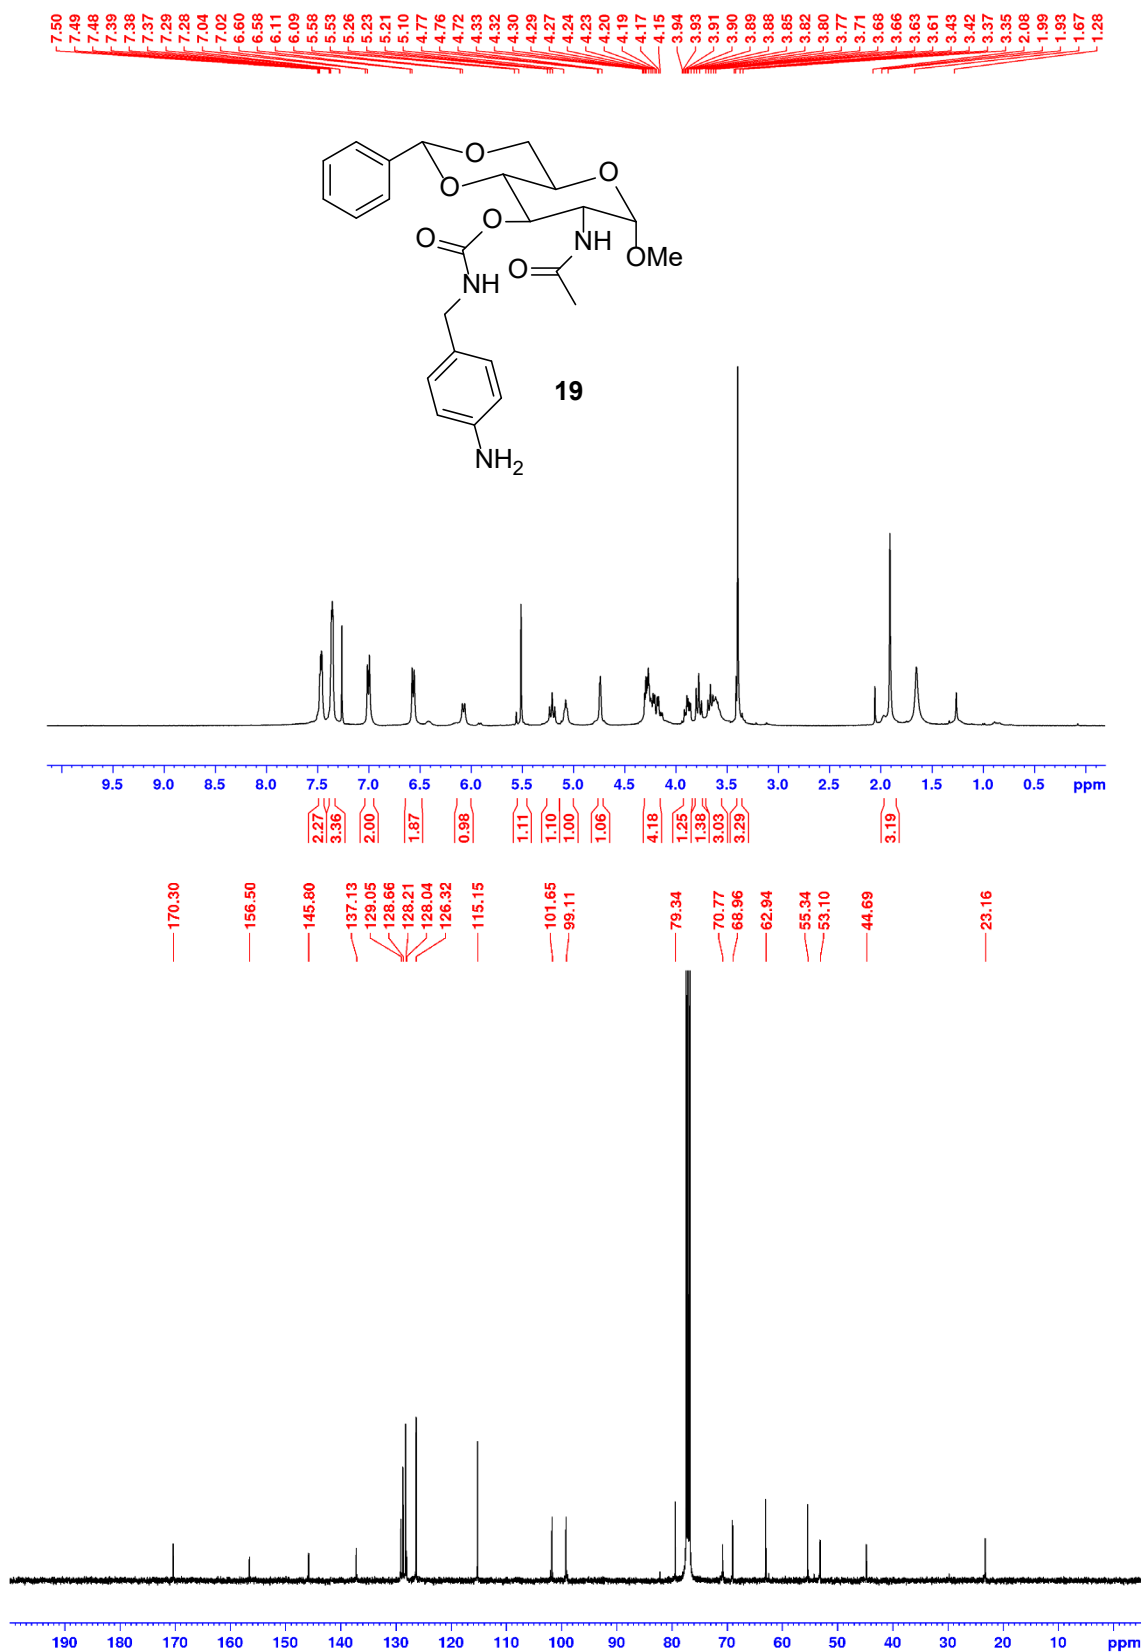

<sup>1</sup>H NMR and <sup>13</sup>C NMR spectra of compound **19** in CDCl<sub>3</sub>



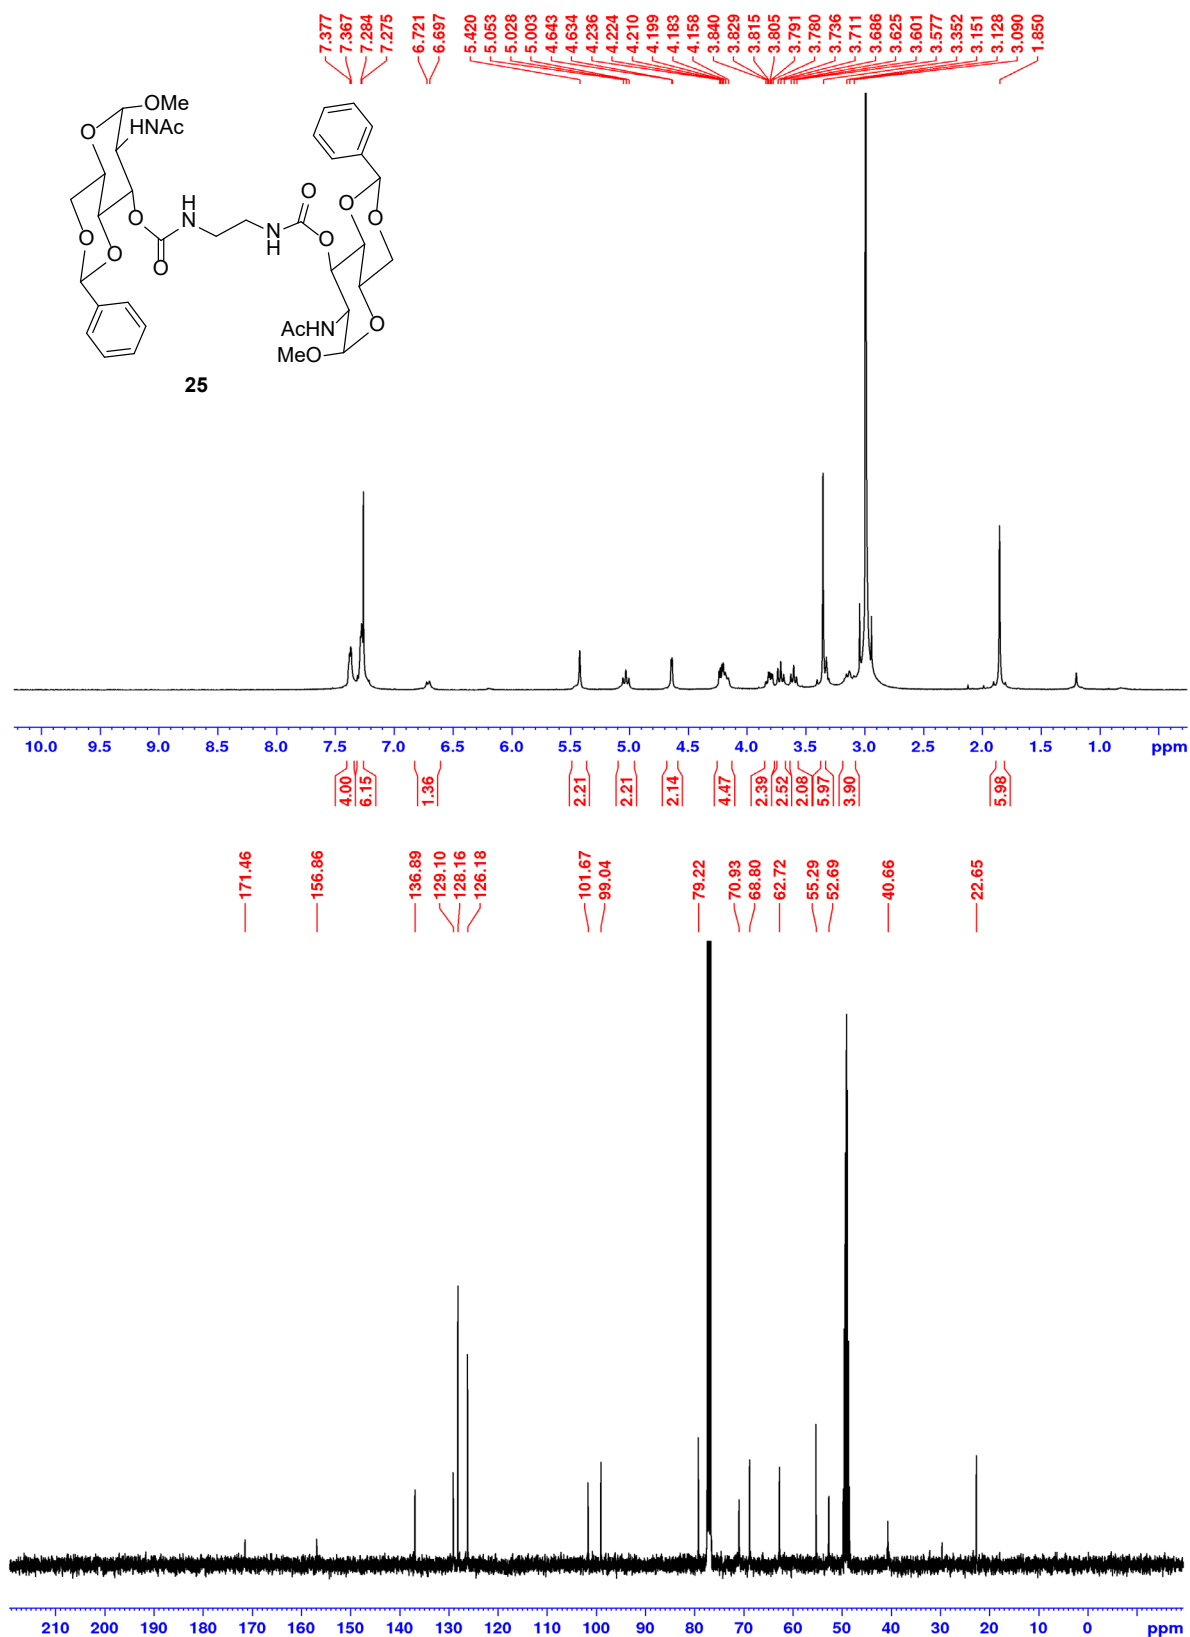

$^1\text{H}$  NMR and  $^{13}\text{C}$  NMR spectra of compound **25** in  $\text{CDCl}_3 + d_4\text{-MeOH}$

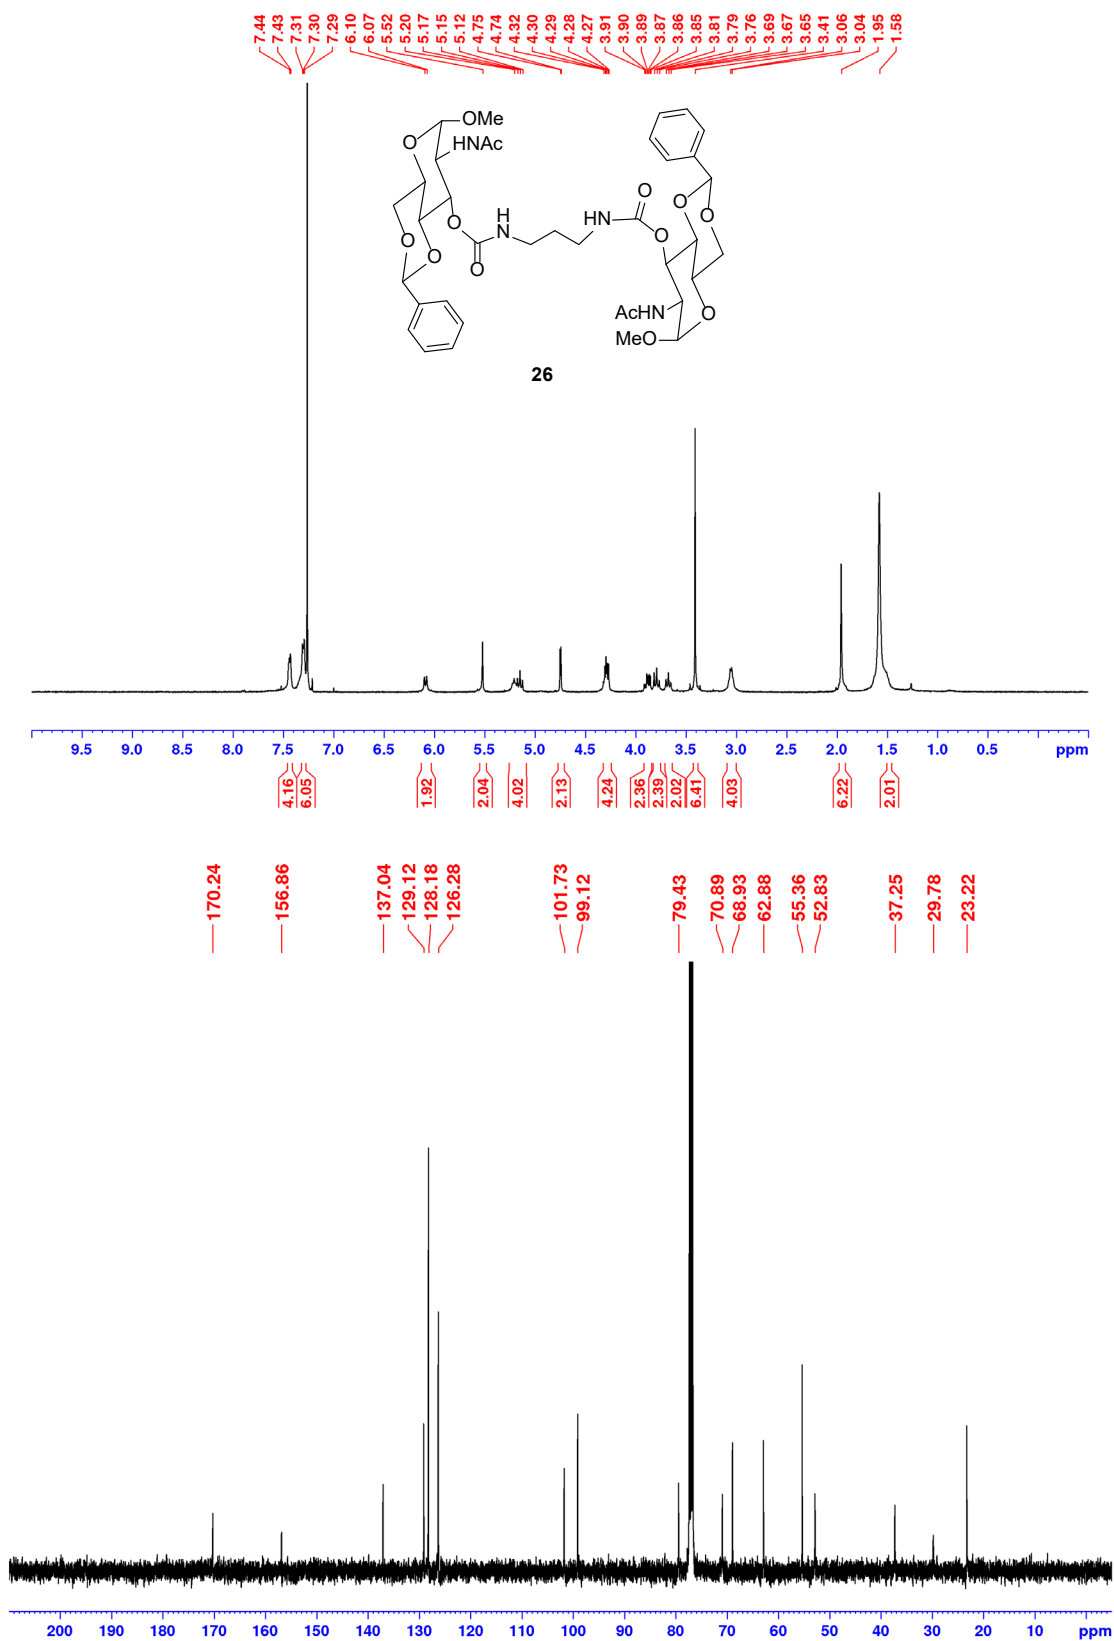

<sup>1</sup>H NMR and <sup>13</sup>C NMR spectra of compound **26** in CDCl<sub>3</sub>

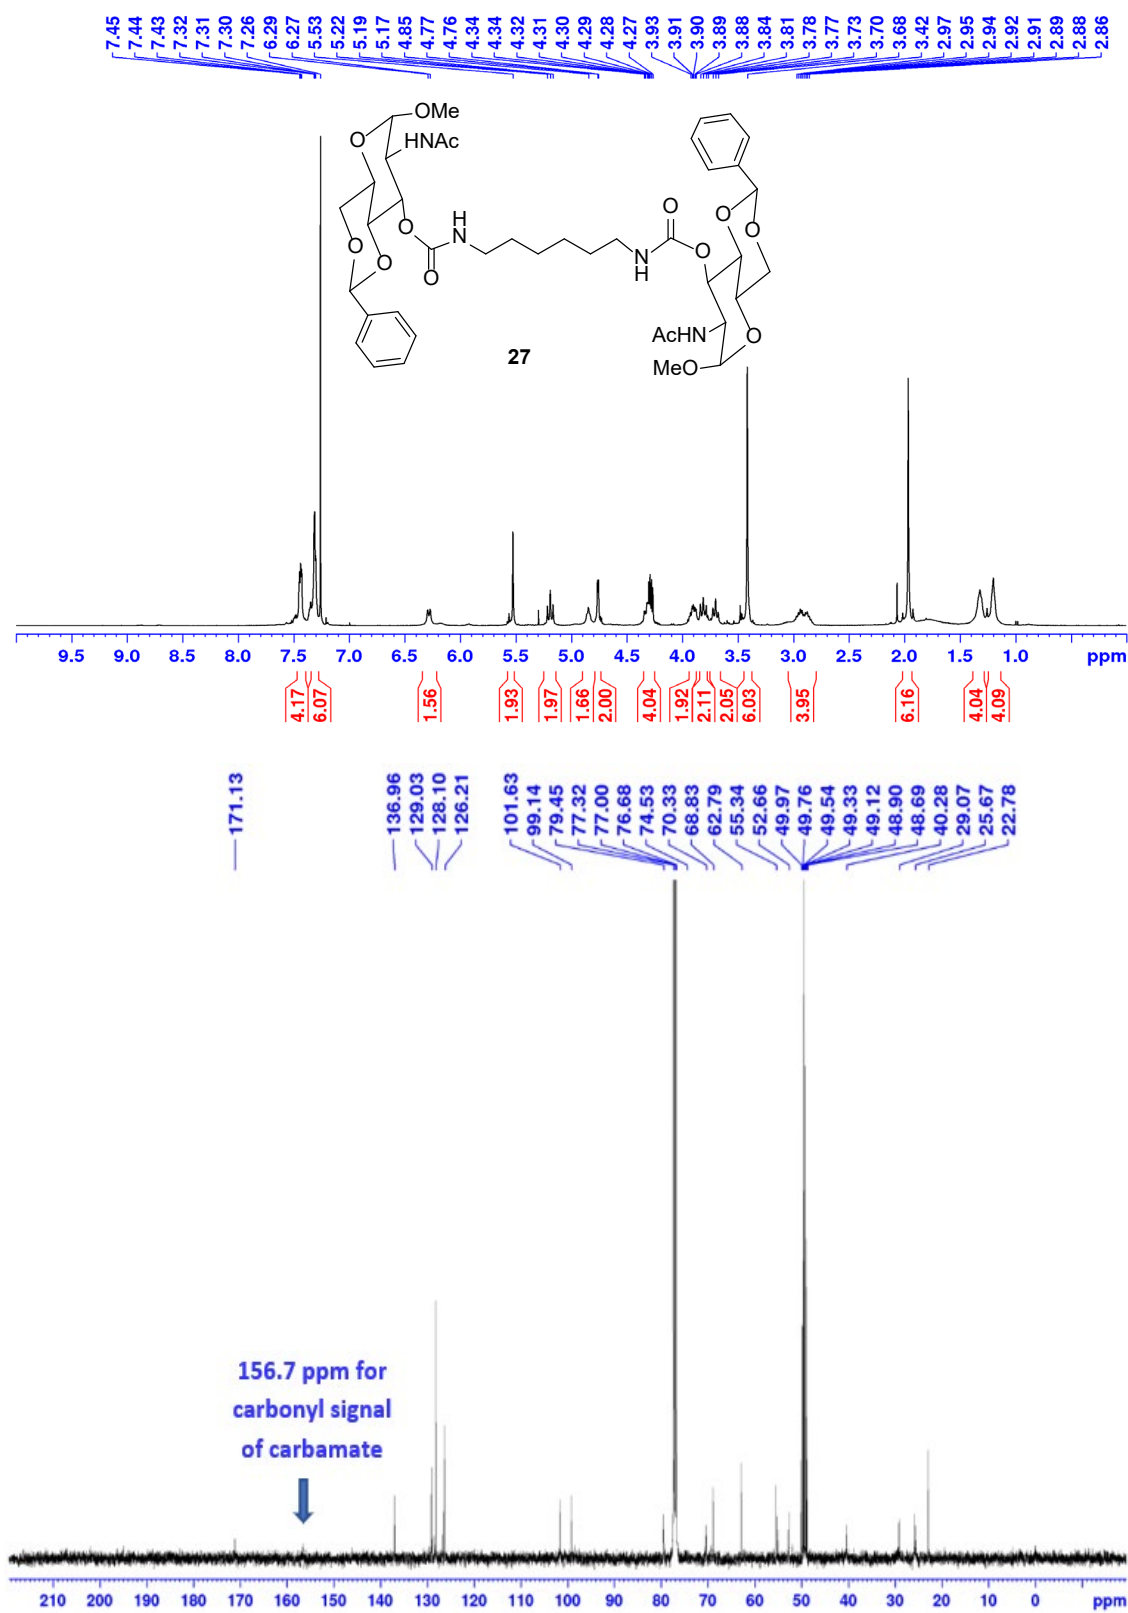

<sup>1</sup>H NMR and <sup>13</sup>C NMR spectra of compound **27** in CDCl<sub>3</sub> + d<sub>4</sub>-MeOH (low solubility in CDCl<sub>3</sub>)

## 2D NMR spectra for compounds, HSQC and COSY spectra

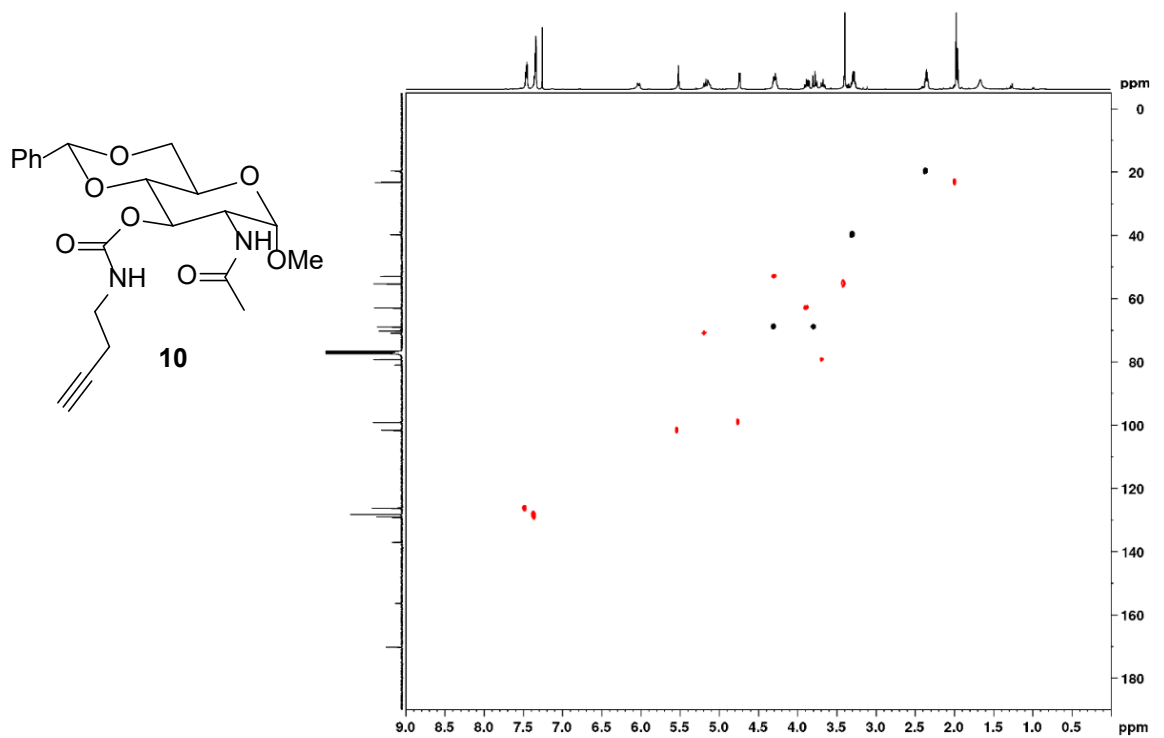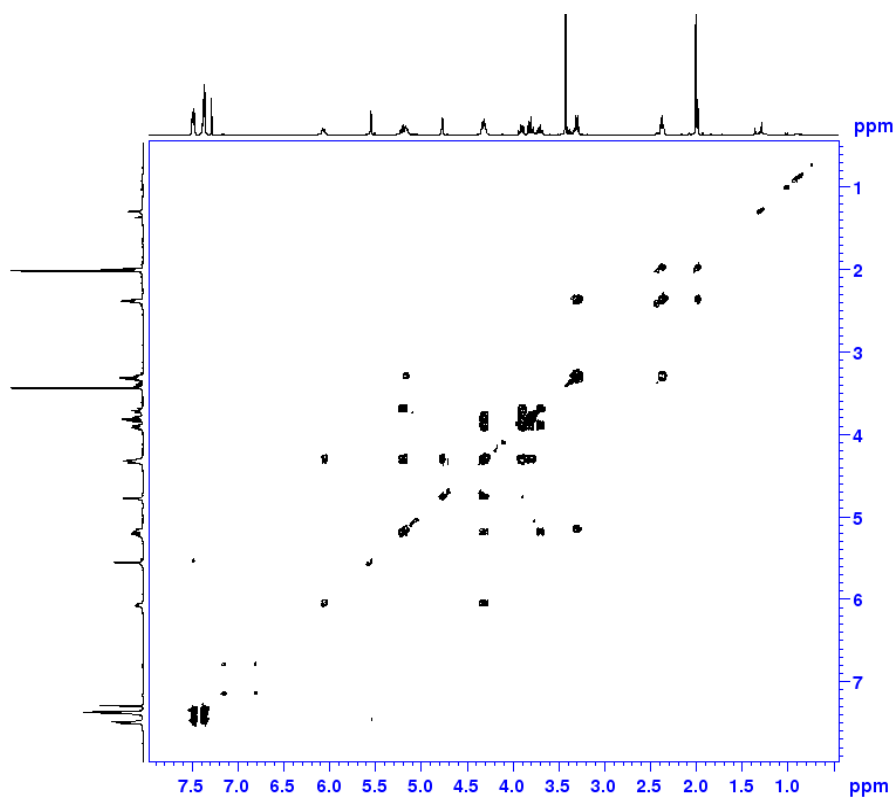

HSQC and COSY NMR spectra of compound 10 in CDCl<sub>3</sub>

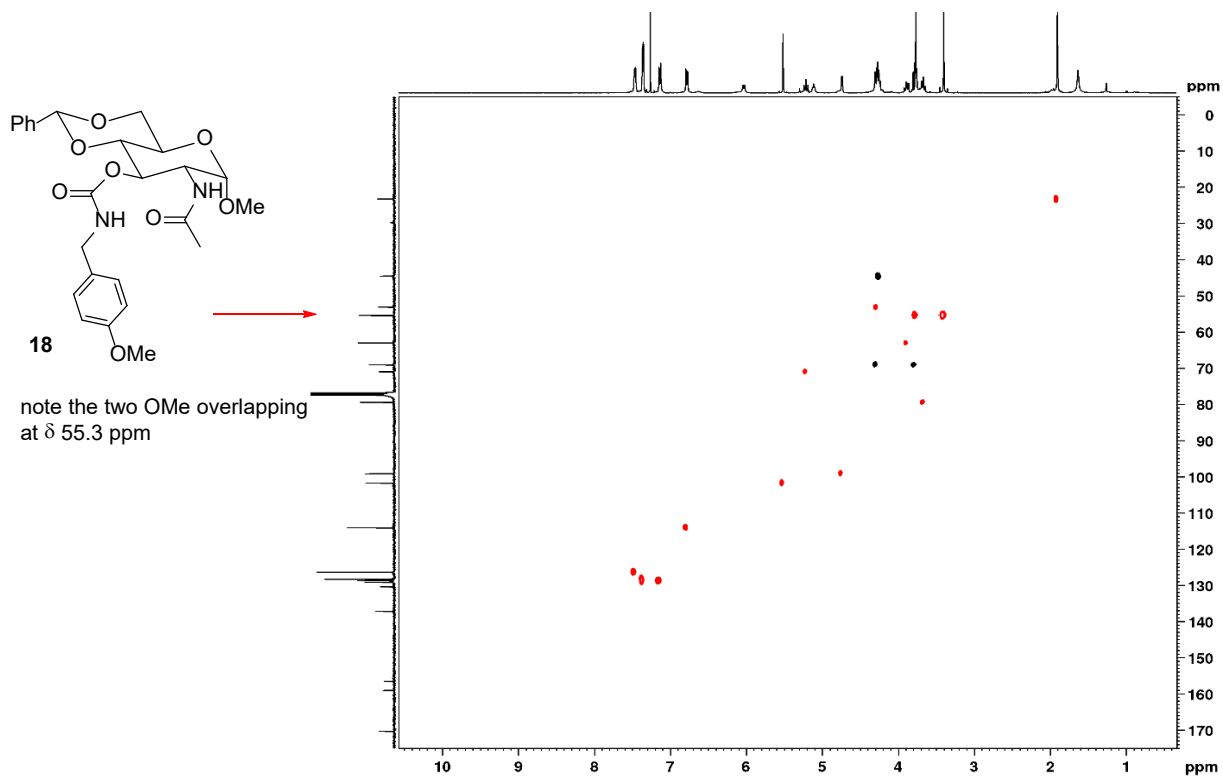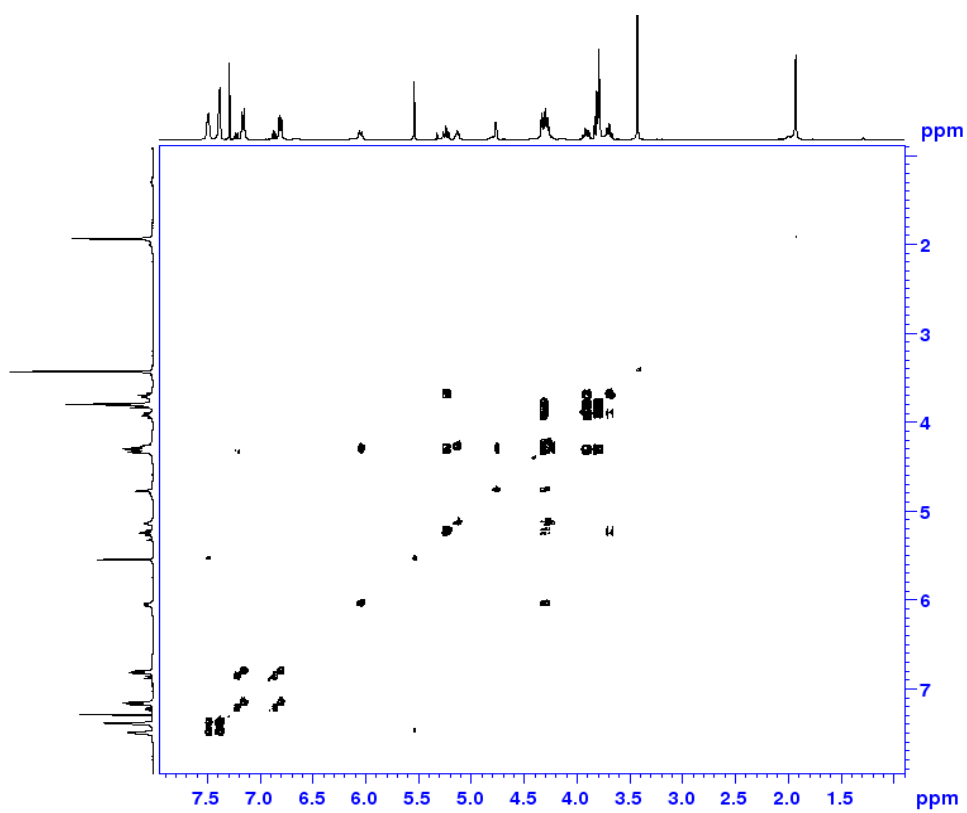

HSQC and COSY NMR spectra of compound **18** in  $\text{CDCl}_3$

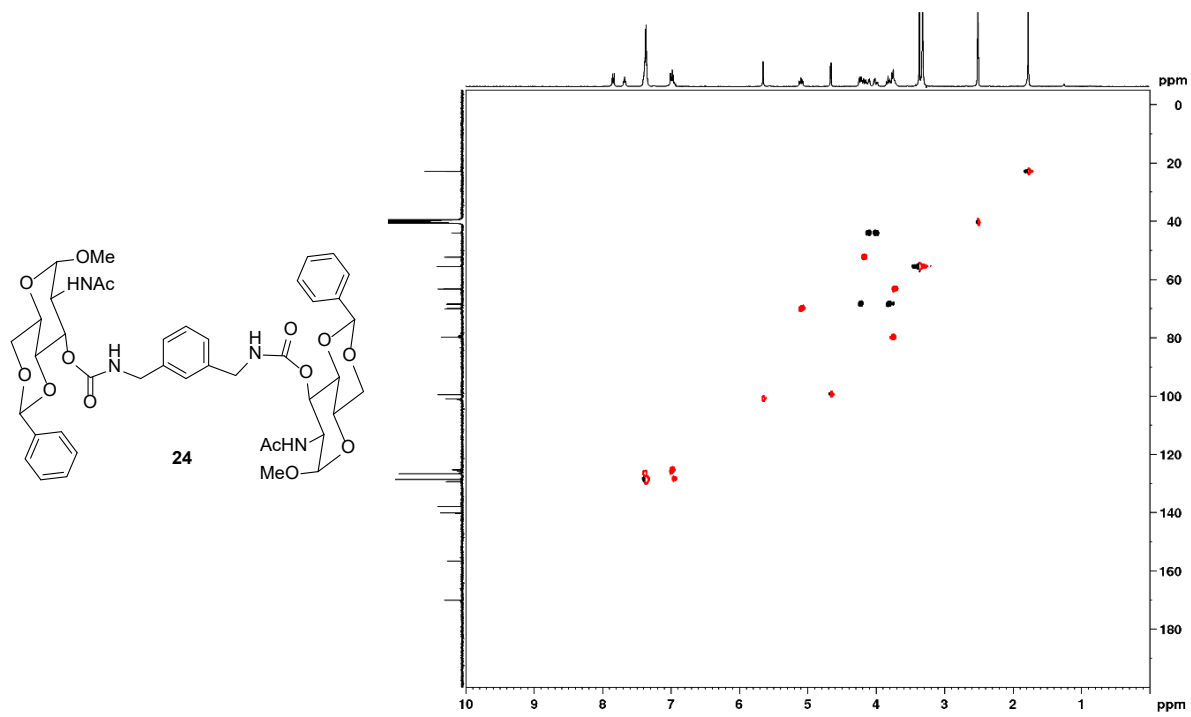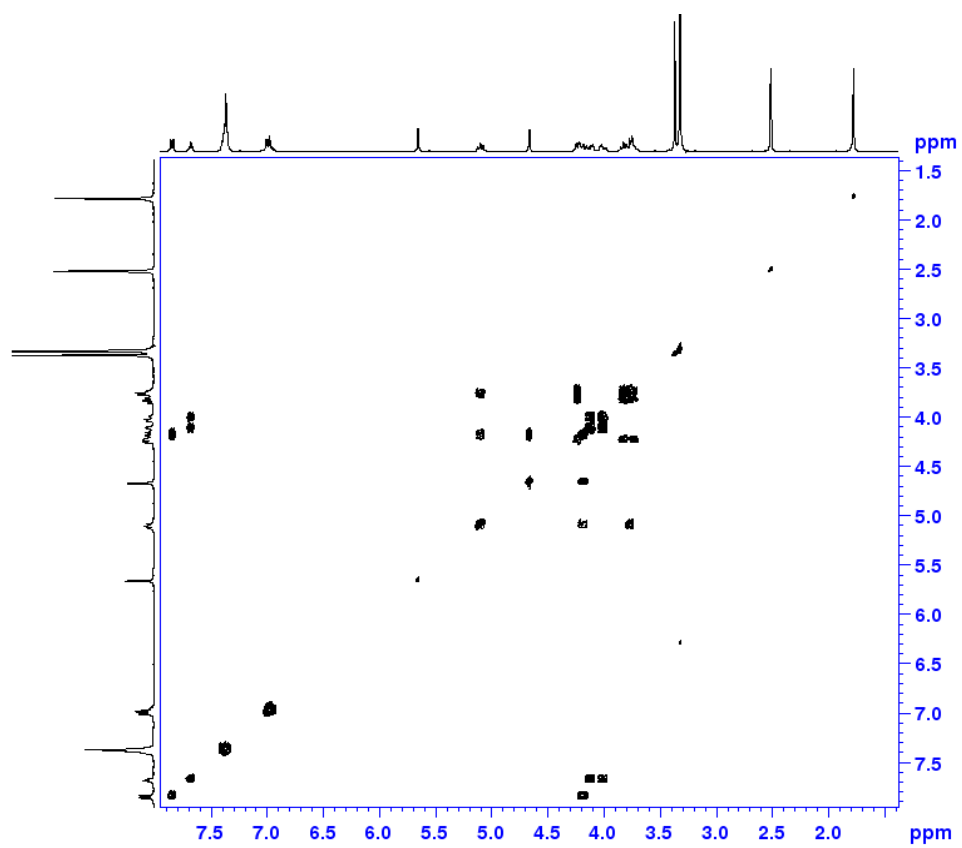

HSQC and COSY NMR spectra of compound **24** in DMSO-*d*<sub>6</sub>
